# Supplementary material for: Simultaneous estimation of seasonal population density, habitat preference and catchability of wild boars based on camera data and harvest records
Source: R Soc Open Sci. 2020 Aug 19;7(8):200579. doi: 10.1098/rsos.200579 (PMC7481676; doi:10.1098/rsos.200579)
Supplement: adult boar [file rsos200579supp4.xlsx]

## Sheet: actpro
actpro
0.392724
0.3648
0.420074
0.574243
0.471284
0.486
0.462576
0.451329
0.305202
0.213983
0.341522
0.432304

## Sheet: cap_b
p2	p3	p4	p5	p6	p7	p8	p9	p10	p11	p12	p13
17	29	24	2	3	2	17	38	18	29	31	19
6	14	6	3	13	12	17	9	14	3	8	7
13	42	34	6	7	23	40	33	19	34	14	14
30	46	15	1	10	7	26	22	20	36	21	17
27	70	20	13	65	84	122	101	76	51	39	26
23	22	11	2	24	26	30	36	24	8	10	5
4	13	11	2	0	0	0	2	5	9	0	0
3	5	8	5	0	4	5	2	3	3	0	0
5	12	9	2	8	6	11	4	8	7	0	0
8	8	2	3	4	3	0	4	2	0	2	4
0	0	0	1	0	3	1	0	2	0	0	0
21	32	24	23	11	28	37	36	35	15	14	6
7	18	24	17	9	6	32	34	31	11	6	8
20	49	48	13	4	13	35	58	31	17	16	13
1	1	12	1	2	2	3	6	5	4	5	8
6	17	21	9	5	3	13	20	24	29	23	25
33	48	41	24	9	24	59	51	53	43	26	10
29	42	42	21	3	5	23	23	21	24	33	14
0	0	0	0	0	0	0	0	0	0	0	0
0	0	0	0	0	0	0	0	0	0	0	0
0	0	0	0	0	0	0	0	0	0	0	0
0	0	0	0	0	0	0	0	0	0	0	0
0	0	0	0	0	0	0	0	0	0	0	0
0	0	0	0	0	0	0	0	0	0	0	0
0	0	0	0	0	0	0	0	0	0	0	0
0	0	0	0	0	0	0	0	0	0	0	0
0	0	0	0	0	0	0	0	0	0	0	0
0	0	0	0	0	0	0	0	0	0	0	0
0	0	0	0	0	0	0	0	0	0	0	0
0	0	0	0	0	0	0	0	0	0	0	0
0	0	0	0	0	0	0	0	0	0	0	0
0	0	0	0	0	0	0	0	0	0	0	0
0	0	0	0	0	0	0	0	0	0	0	0

## Sheet: cap_s
p2	p3	p4	p5	p6	p7	p8	p9	p10	p11	p12
1	1	1	2	3	3	1	6	1	1	2
0	0	0	0	0	0	0	0	0	2	1
0	0	0	0	0	0	1	0	0	0	1
2	3	1	0	1	1	0	2	0	0	0
11	6	9	7	13	17	18	6	6	10	8
5	1	2	6	3	10	12	8	10	3	0
14	13	14	11	27	21	12	12	17	12	0
1	6	19	22	21	20	10	16	16	10	0
4	2	3	15	18	7	8	5	10	7	0
6	2	8	19	26	20	16	12	16	12	5
2	1	6	2	0	2	3	2	2	0	3
3	7	2	12	17	19	10	8	10	4	5
3	3	1	4	11	9	6	6	5	5	0
5	9	5	1	4	7	9	8	7	6	3
9	7	17	12	23	23	16	12	16	16	13
12	11	15	32	37	34	20	19	20	28	21
5	15	7	8	6	12	15	9	10	9	5
16	11	10	10	15	13	12	12	10	6	5
0	0	0	0	0	0	0	0	0	0	0
0	0	0	0	0	0	0	0	0	0	0
0	0	0	0	0	0	0	0	0	0	0
0	0	0	0	0	0	0	0	0	0	0
0	0	0	0	0	0	0	0	0	0	0
0	0	0	0	0	0	0	0	0	0	0
0	0	0	0	0	0	0	0	0	0	0
0	0	0	0	0	0	0	0	0	0	0
0	0	0	0	0	0	0	0	0	0	0
0	0	0	0	0	0	0	0	0	0	0
0	0	0	0	0	0	0	0	0	0	0
0	0	0	0	0	0	0	0	0	0	0
0	0	0	0	0	0	0	0	0	0	0
0	0	0	0	0	0	0	0	0	0	0
0	0	0	0	0	0	0	0	0	0	0

## Sheet: eff
p2	p3	p4	p5	p6	p7	p8	p9	p10	p11	p12	p13
1900800	2678400	2678400	1382400	0	604800	2678400	2678400	2419200	2678400	2592000	2678400
172800	2592000	0	0	0	2246400	1296000	0	2073600	2678400	2592000	2678400
172800	2678400	2678400	2592000	2678400	2592000	1555200	0	2073600	2678400	2592000	2678400
2592000	2678400	2678400	2592000	2505600	691200	2678400	2678400	2419200	2678400	2592000	2592000
2592000	1382400	0	0	0	2073600	2678400	2678400	1036800	0	0	0
86400	2678400	2505600	0	0	604800	2678400	2678400	2419200	2678400	2592000	2592000
86400	2678400	2678400	2592000	1468800	604800	2678400	2678400	2419200	2678400	2592000	2592000
86400	86400	0	0	0	604800	2678400	2678400	2419200	2678400	2592000	2678400
0	0	0	0	0	604800	2678400	2678400	2419200	2678400	2592000	2678400
1900800	2678400	2678400	2592000	259200	604800	2678400	2678400	2419200	2678400	2592000	2678400
172800	2678400	2678400	1555200	0	604800	1296000	0	2073600	2678400	2592000	2678400
1900800	2332800	0	0	0	2246400	777600	0	864000	0	0	0
0	0	0	0	0	86400	0	0	86400	0	0	0
86400	2678400	2678400	2592000	2678400	2592000	2678400	518400	0	0	0	0
345600	0	0	0	0	691200	691200	0	691200	0	0	0
2592000	2678400	2678400	2592000	1987200	691200	2678400	2678400	2419200	2678400	2592000	2678400
691200	0	0	0	0	691200	2678400	2678400	2419200	2678400	2592000	2592000
1900800	2678400	2678400	2592000	2592000	691200	2678400	2678400	2419200	2678400	2592000	2592000
1900800	2678400	2678400	2592000	1555200	604800	2678400	2678400	2419200	2678400	2592000	2678400
1900800	2678400	2678400	2592000	864000	432000	2678400	2678400	2419200	2678400	1036800	0
1900800	2678400	2678400	2592000	2073600	604800	2678400	2678400	2419200	2678400	2592000	2678400
1900800	2678400	2678400	518400	0	2073600	2678400	2678400	2419200	2678400	2592000	2678400
1900800	2332800	0	0	0	2073600	2678400	2678400	518400	0	0	0
172800	2678400	2678400	2419200	0	0	0	0	2073600	2678400	1900800	0
2592000	2678400	2678400	1641600	0	604800	2678400	2678400	2419200	2678400	2592000	2678400
2592000	2678400	2678400	2592000	2678400	2592000	2678400	950400	86400	0	0	0
2592000	2678400	2678400	2592000	2678400	2592000	2678400	2678400	2419200	2678400	2592000	2678400
2592000	2073600	0	0	0	2246400	1728000	0	2246400	1900800	0	0
2592000	2678400	2678400	2073600	0	604800	2678400	2678400	2419200	2678400	2592000	2592000
2592000	2678400	2678400	604800	0	691200	2505600	0	86400	0	0	0
1900800	1036800	0	0	0	2073600	2678400	2678400	2419200	2678400	2592000	2678400
1814400	2678400	2678400	2073600	0	2073600	2678400	2678400	2419200	1382400	0	0
172800	2678400	2678400	1468800	0	2073600	518400	0	2073600	2678400	2592000	2678400
2592000	259200	0	0	0	2246400	2678400	2678400	2419200	2678400	2592000	2592000
2592000	2678400	2678400	2592000	2678400	1728000	0	0	432000	0	0	0
2592000	2678400	518400	0	0	691200	0	0	432000	0	0	0
0	2592000	2678400	2592000	2678400	2592000	2505600	0	2246400	2678400	2592000	2678400
2592000	2678400	2246400	518400	2678400	1382400	0	0	2246400	1900800	0	0
0	2592000	2678400	2592000	2678400	2592000	2678400	2678400	2419200	2678400	2592000	2678400
2592000	2678400	2678400	2592000	2678400	2246400	0	0	2160000	2678400	2592000	2678400
86400	2678400	2678400	2592000	1123200	2073600	2678400	2678400	2419200	2678400	2592000	2592000
86400	2678400	2678400	2592000	2678400	2592000	2678400	2678400	2419200	2678400	2592000	2592000
2592000	2678400	2678400	2419200	0	2073600	2678400	2678400	2419200	2678400	2592000	1814400
1900800	2678400	2678400	2505600	0	2073600	2160000	0	2160000	2678400	1641600	0
1900800	2678400	2678400	2332800	0	2073600	864000	0	345600	0	0	0
2592000	2678400	2678400	2592000	2678400	2592000	2678400	0	2332800	2678400	1296000	0
2592000	2678400	1036800	0	0	2246400	2678400	2678400	2419200	2678400	2592000	2678400
1814400	2678400	2678400	2592000	691200	2246400	2678400	2678400	2419200	2678400	2592000	0
1555200	0	0	0	0	864000	0	0	345600	0	0	0
0	1555200	0	0	0	864000	0	0	2246400	2678400	2592000	2678400
0	0	0	0	0	2073600	2678400	2678400	2419200	2678400	2592000	2678400
86400	345600	0	0	0	2073600	2678400	1382400	2160000	2678400	86400	0
2592000	2678400	2678400	1900800	0	1468800	0	0	2160000	86400	0	0
1900800	2073600	0	0	0	518400	2678400	2678400	2419200	2678400	2592000	2592000
1814400	2678400	2678400	2592000	2678400	2592000	2678400	2678400	2419200	2678400	2592000	1900800
2592000	2678400	864000	0	0	518400	2678400	2678400	2419200	2678400	2592000	2678400
0	0	0	0	0	0	0	0	0	0	0	0
2592000	2678400	2678400	2592000	604800	2246400	2678400	2678400	432000	0	0	0
2592000	2678400	2419200	0	0	2246400	2678400	2678400	2419200	2678400	2592000	2073600
2592000	2678400	2678400	2592000	2678400	2592000	2678400	2678400	2419200	2678400	2592000	2678400
1209600	0	0	0	0	518400	2678400	2678400	2419200	2678400	2592000	2678400
1123200	0	0	0	0	518400	2678400	2678400	2419200	2678400	2592000	2678400
86400	259200	0	0	0	518400	2678400	2678400	2419200	2678400	1900800	0
1382400	0	0	0	0	86400	0	0	1555200	0	0	0
2592000	2678400	1036800	0	0	518400	2678400	2678400	2419200	2678400	2592000	2678400
86400	2678400	2678400	2592000	2678400	2592000	2678400	2678400	0	0	604800	2678400
86400	2678400	2678400	2246400	0	518400	2678400	1900800	2160000	2678400	2592000	1728000
86400	2678400	2678400	2592000	2505600	518400	2678400	2678400	2419200	777600	0	0
2592000	2678400	2678400	2592000	2678400	2592000	1900800	0	0	0	0	0
0	0	0	0	0	0	0	0	691200	0	0	0
1814400	2678400	2678400	2592000	2678400	2592000	2678400	2678400	2419200	2678400	950400	0
1814400	2678400	2678400	2592000	2678400	2592000	2678400	2678400	2419200	2678400	2592000	2419200
0	864000	0	0	0	518400	2678400	2678400	2419200	2678400	2592000	2678400
345600	0	0	0	0	518400	2678400	2678400	259200	0	0	0
86400	2678400	2678400	2592000	1728000	432000	2678400	2678400	2419200	2678400	2592000	2678400
2592000	2678400	345600	0	0	172800	0	0	0	0	691200	2678400
1900800	2678400	1036800	0	0	518400	2678400	2678400	2419200	2678400	2246400	2678400
0	0	0	0	0	2160000	518400	0	0	0	518400	2678400
86400	2678400	2678400	1296000	0	518400	0	0	0	0	0	0
2592000	2678400	2678400	2592000	2678400	2592000	2678400	2332800	2160000	2678400	2592000	2592000
1468800	0	0	0	0	86400	0	0	86400	0	0	0
1814400	1123200	0	0	0	86400	0	0	0	0	0	0
1814400	2678400	2678400	1296000	0	2160000	2678400	2678400	345600	0	0	0
172800	2678400	1209600	0	0	604800	172800	0	2160000	2678400	950400	0
2592000	1814400	0	0	0	86400	0	0	86400	0	0	0
2592000	2678400	1296000	0	0	0	0	0	604800	0	0	0
2160000	0	0	0	0	432000	691200	0	1123200	0	0	0
0	1728000	0	0	0	518400	1900800	0	950400	0	0	0
2592000	1814400	0	0	0	518400	2678400	2678400	2419200	2678400	2592000	2678400
2592000	86400	0	0	0	518400	2678400	2678400	2419200	2678400	2592000	2678400
1209600	0	0	0	0	0	0	0	0	0	0	0
86400	2678400	2678400	2592000	864000	432000	172800	0	0	0	518400	1123200
2592000	518400	864000	2592000	2678400	2592000	2678400	2678400	2419200	2678400	2592000	1814400
2592000	2678400	2678400	1987200	0	2160000	777600	0	0	0	432000	2678400
2592000	2678400	2678400	1209600	0	2160000	1036800	0	518400	0	0	0
2592000	2678400	2678400	1900800	0	2160000	2678400	2678400	2332800	2678400	2592000	2592000
1555200	0	0	0	0	2160000	2678400	2678400	2419200	2678400	2592000	2678400
2592000	2678400	172800	0	0	345600	0	0	2160000	2678400	2592000	2678400
0	2678400	2678400	1641600	0	2160000	259200	0	0	0	0	0
0	2678400	2678400	2592000	86400	2160000	2678400	2678400	2419200	2678400	2592000	2678400
0	2678400	2678400	2592000	2678400	2592000	2419200	0	691200	0	0	0
2592000	2678400	2678400	2592000	2073600	1987200	0	0	950400	0	0	0
1814400	2678400	2678400	2505600	0	259200	2678400	2678400	2419200	2678400	2592000	2678400
0	2678400	2678400	2592000	2678400	2592000	1641600	0	0	0	518400	345600
0	2678400	2678400	950400	0	432000	2678400	2678400	2419200	2678400	2505600	0
86400	2678400	2678400	2592000	2678400	2592000	2678400	2678400	2419200	2678400	518400	2678400
2592000	2678400	2678400	2246400	0	2160000	2678400	2678400	2419200	2678400	2592000	2592000
86400	2678400	2678400	2592000	950400	2160000	2678400	2678400	2419200	2678400	2592000	2678400
2592000	2678400	259200	0	0	2160000	2678400	2678400	2419200	2678400	2592000	172800
0	2678400	2678400	518400	0	2160000	2678400	2678400	2419200	1468800	604800	2678400
0	1036800	0	0	0	172800	0	0	0	0	0	0
2592000	2678400	1987200	0	0	518400	0	0	2160000	2678400	2592000	2678400
2592000	2246400	0	0	0	518400	2678400	2678400	2419200	2678400	2592000	2678400
1814400	2678400	2678400	2592000	86400	2160000	2678400	2678400	2419200	2678400	2592000	2678400
0	2678400	1987200	0	0	2073600	2678400	2678400	2419200	2678400	691200	0
2592000	1900800	1382400	2592000	2678400	1123200	1036800	2678400	2419200	1900800	604800	2678400
2592000	2678400	2678400	2592000	1987200	0	1036800	2678400	2419200	2678400	2592000	2678400
2592000	2678400	2678400	2592000	2678400	2592000	2678400	2678400	2419200	2678400	2073600	0
2592000	2678400	2678400	2592000	518400	0	1036800	2678400	2419200	2678400	2592000	2332800
2592000	864000	0	0	0	0	0	0	0	0	0	0
2592000	2678400	2678400	2592000	2678400	2592000	2678400	2678400	2419200	2678400	2592000	2678400
2592000	2678400	2678400	2592000	2678400	172800	1036800	2678400	2419200	2678400	2592000	2678400
2592000	2678400	2678400	2592000	2678400	950400	1036800	2678400	2419200	2678400	2592000	2678400
2592000	2678400	2678400	2592000	2678400	2592000	2678400	2678400	2419200	2678400	2592000	2678400
0	0	172800	0	0	0	950400	2678400	2419200	0	518400	2678400
2592000	2678400	2678400	2592000	2678400	2592000	2678400	2678400	2419200	2678400	1555200	0
2592000	2678400	1296000	0	0	0	950400	2678400	2419200	2678400	2592000	2678400
2592000	2678400	2678400	2592000	2678400	1209600	1036800	2678400	2419200	172800	518400	2678400
2592000	2678400	2678400	2592000	2073600	518400	2678400	2678400	2419200	2678400	1382400	2678400
2592000	2678400	2678400	864000	0	0	950400	2678400	2419200	1987200	518400	432000
2592000	2678400	2678400	2592000	2678400	2592000	2678400	2505600	0	0	172800	0
2592000	2678400	2678400	2592000	2160000	0	950400	2678400	2419200	2678400	2592000	2678400
2592000	2678400	2678400	2592000	2678400	2592000	2678400	2678400	2419200	2678400	1296000	2678400
1296000	86400	0	0	0	86400	0	0	0	0	518400	2678400
2592000	2678400	2678400	2592000	259200	0	950400	2678400	2419200	2678400	2332800	0
2592000	2678400	2678400	2592000	2678400	2592000	2678400	2678400	1036800	0	518400	172800
2592000	2678400	1209600	0	0	518400	0	0	0	0	518400	0
2592000	2678400	2678400	2592000	2678400	2592000	2678400	2678400	2419200	2678400	2592000	2678400
2592000	2678400	2678400	2592000	2678400	2592000	1296000	2678400	2419200	2678400	2592000	2678400
2592000	2678400	2419200	0	0	0	950400	2678400	2419200	2678400	1036800	2160000
2592000	2678400	2678400	2592000	2678400	1814400	2678400	2678400	2419200	2332800	518400	2678400
2592000	2678400	1468800	0	0	432000	2678400	2678400	2419200	2419200	518400	2678400
2592000	2678400	2678400	2592000	86400	0	950400	2678400	2419200	1987200	0	0
2592000	2678400	2678400	2592000	2678400	2592000	2678400	2678400	604800	0	518400	2678400
2592000	2678400	2678400	2592000	2678400	2505600	2678400	2678400	2419200	172800	432000	2678400
2592000	2678400	2678400	2592000	2678400	2592000	2678400	2678400	2419200	2678400	2505600	2678400
2592000	2678400	2678400	2592000	2678400	2592000	2678400	2678400	2419200	2678400	2592000	2678400
2592000	2678400	2678400	2592000	2678400	2592000	2678400	2678400	2419200	2678400	2505600	2678400
2592000	2678400	2160000	2592000	2678400	2592000	172800	0	0	0	432000	86400
2592000	2678400	2678400	2592000	2678400	2592000	1814400	0	0	0	432000	2678400
2592000	2678400	2678400	2592000	2678400	2592000	2678400	2678400	2419200	2678400	2592000	2678400
2592000	2678400	2678400	2592000	691200	0	0	0	0	0	0	0
2592000	2678400	2678400	2592000	2246400	0	0	0	0	0	0	0
2592000	2678400	2678400	2592000	2678400	2592000	2678400	2678400	2419200	2678400	2592000	2678400
2332800	0	1468800	2592000	1296000	432000	2678400	2678400	2419200	2678400	2592000	2678400
2592000	2678400	2678400	2592000	2678400	2592000	2678400	2678400	2419200	2678400	2246400	0
2592000	2678400	1468800	0	0	0	950400	2678400	2419200	2678400	2592000	2678400
2592000	2678400	2678400	2592000	2678400	2592000	2678400	2678400	2419200	2678400	2592000	2678400
2592000	2678400	2678400	2592000	2678400	1814400	2678400	2678400	2419200	2678400	2592000	2678400
2592000	2678400	2678400	2592000	2678400	2592000	2678400	2678400	2419200	1123200	432000	2678400
2592000	2678400	1814400	0	0	432000	259200	0	0	0	432000	86400
2592000	2678400	2678400	1814400	0	0	0	0	0	0	0	0
2592000	2678400	2678400	1468800	0	0	0	0	0	0	0	0
2592000	2678400	2678400	2592000	86400	432000	2678400	2678400	2246400	0	518400	2678400
2592000	2678400	2678400	2246400	0	0	86400	0	0	0	432000	172800
2592000	2678400	2678400	2592000	259200	432000	2678400	2678400	2419200	2678400	2505600	2678400
2592000	2678400	2678400	2592000	2678400	864000	0	0	0	0	0	0
2592000	2678400	2678400	2592000	2678400	2592000	2678400	2678400	1555200	0	432000	2678400
2592000	2678400	2678400	2592000	86400	432000	1123200	0	0	0	432000	2678400
2592000	2678400	2678400	2592000	2678400	1555200	172800	0	0	0	0	0
2592000	2678400	2678400	2592000	1296000	432000	1987200	0	0	0	432000	2678400
2592000	2678400	2678400	2592000	950400	432000	2678400	2678400	2419200	2678400	2073600	2678400
2592000	2678400	2678400	2592000	2678400	1296000	2678400	2678400	2419200	2678400	2592000	2678400
2592000	2678400	777600	0	0	0	0	0	0	0	0	0
2592000	2678400	2678400	2592000	345600	432000	2678400	2678400	2419200	2678400	2592000	2678400
2592000	2678400	2678400	2592000	2505600	432000	2678400	2678400	2419200	2678400	518400	2678400
2592000	2678400	2678400	2592000	2678400	2592000	2678400	2419200	0	0	432000	2678400
2592000	2678400	2678400	2592000	2678400	2246400	2678400	2678400	2419200	2678400	2592000	2678400
2592000	2678400	2678400	2592000	2678400	2592000	2678400	2678400	2419200	2678400	2592000	2678400
2592000	2505600	1641600	1555200	0	432000	2419200	0	0	0	432000	2678400

## Sheet: nstay
nstay
50
50
50
50
50
51
51
50
50
50
50
50

## Sheet: stay
p2	p3	p4	p5	p6	p7	p8	p9	p10	p11	p12	p13
13.31	0.55	0.93	0.54	6.31	1.19	7.24	0.83	0.56	1.39	2.95	0.41
54.5	1.13	5.74	22.92	0.68	0.81	1.91	14.91	27.78	0.4	0.59	2.13
1.22	0.93	2.3	2.24	35.61	3.96	37.97	8.55	32.28	1.3	0.43	1.7
0.39	4.45	0.25	0.6	6.68	3.53	2.63	0.9	0.26	0.28	18.42	0.25
47.67	2.91	3.65	1.88	2.26	2.58	1.04	27.18	0.35	0.13	29.46	0.29
3.27	1.94	1.66	2.72	2.08	8.42	1.94	58.51	1.53	2.12	0.53	2
7.83	1.37	2.38	13.62	4.58	23.15	25.33	2.13	2.15	4.32	0.47	0.32
18.23	0.93	1.86	32.13	1.31	4.92	15.35	0.39	10.62	0.53	21.28	18.13
11.89	0.35	30.22	8.3	4.97	12.14	1.1	7.86	10.29	7.85	18.75	13.69
5.5	2.3	0.17	2.73	25.55	3.17	6.57	3.33	6.95	40.18	2.35	3.15
16.4	2.52	0.55	1.32	57.22	1.48	2.07	12.9	6.71	0.53	1.95	0.23
3.42	3.1	0.8	3.41	2.08	2.52	2.72	4.56	9.43	0.23	0.43	0.2
3.63	8.2	2.63	1.76	0.73	2.96	4.6	0.6	2.72	1.56	36.25	77.64
0.5	11.1	3.44	4.75	3.81	0.85	1.48	9	2.32	1.73	21.35	12.09
1.35	0.81	4.6	1.26	1.69	1.52	0.33	0.98	7.5	1.29	6.6	9.56
3.8	2.14	13.32	3.55	5.56	5.52	2.09	0.75	0.51	1	14.35	3.06
0.25	0.36	2.51	0.51	2.17	16.98	10.74	1.26	12.1	1.36	0.51	2.22
1.13	23.46	4.49	2.37	1.94	2.35	4.3	0.55	32.4	0.15	1.05	2.09
0.4	9.82	2.52	1.95	0.83	22.62	6.4	7.15	3.72	1.28	2.96	4.66
2	1.8	15.35	7.55	1.36	1.68	0.41	8.8	1.96	2.55	1.09	2.29
1.1	20.64	13.81	0.53	1.9	14.43	5.54	4.72	0.33	16.91	1.3	1.46
2.61	0.91	52.75	3.41	2.35	1.43	4.38	0.33	11.39	14.98	1.05	13.55
0.96	2.56	1.76	0.61	1.16	4.49	2.96	1.95	26.24	1.4	35.5	5.49
1.7	1.78	1.29	0.95	28.88	25.42	5.04	1.95	1.59	2.2	3.4	3.62
2.29	5.65	7.72	2.07	0.74	18.33	0.6	9.26	1.12	9	0.26	0.18
2.38	1.53	2.3	0.22	2.5	0.96	2.26	0.19	6.79	41.33	0.82	15.46
1.33	14.54	0.54	2.74	1.5	1.88	2.4	0.31	1.16	103.32	6.26	3.41
3.75	28.14	5.64	1.5	10.17	3.08	0.32	12.02	0.23	21.25	3.59	6.09
6.96	29.69	0.31	1.27	2.34	1.35	2.05	3.96	1.3	5.69	0.58	1.48
0.68	24.86	1.08	1.51	1.61	2.25	2.22	0.48	25.11	1.66	3.62	15.65
12.26	9.39	2.16	7.14	2.71	1.5	1.08	0.69	1.83	2.12	0.98	3.83
1.68	1.66	0.31	8.84	5.82	2.37	1.3	9.8	2.63	3.32	0.46	0.7
7.16	2.36	0.75	0.46	2.09	25.41	4.04	3.43	5.26	0.86	0.16	4.45
0.2	1.95	0.81	21.42	0.31	1.81	35.12	1.36	3.53	23.88	2.42	0.3
0.55	1.79	1.73	34.85	1.56	6.58	4.47	1.86	6.29	5.6	7.09	1.01
0.86	2.51	2.31	1.08	1.11	0.41	2.78	6.69	1.45	4.83	9.73	6.36
1.36	1.53	8.96	2.37	11.85	11.69	0.88	17.83	4.3	0.35	4.73	9.09
0.89	4.87	15.21	2.68	0.57	28.85	5.44	54.78	0.4	0.32	1.2	14.39
13.91	1.37	13.56	2.7	3.03	1.86	8.88	13.62	1.02	0.38	2.52	3.45
2.22	0.45	2.73	1.81	0.78	5.7	11.02	2.37	1.1	1.46	8.32	4.46
1.67	0.95	8.29	1.99	1.16	13.95	21.15	0.29	2.72	2.12	0.16	2.6
0.29	2.99	14.14	0.53	0.41	0.64	4.27	1.03	5.46	2.52	8.22	1.13
1.76	31.81	1.54	0.4	1.54	13.71	3.16	0.31	0.2	1.82	0.13	1.95
20.87	5.88	0.9	22.1	0.75	6.41	10.23	3.58	3.23	2.2	1.39	2.05
0.9	2.19	0.99	6	1.05	0.84	4.02	3	0.6	10.51	27.33	5.33
1.4	1.31	0.76	0.96	0.81	0.41	8.44	2.1	0.4	0.18	0.43	0.53
23.41	1.9	0.91	0.53	2.09	22.48	12.67	2.55	1.06	3.36	3.1	1.12
4.81	2.76	1.19	2.36	0.8	1.36	3.48	0.14	77.96	0.56	1.58	2.76
2.57	2.4	7.98	3.32	0.29	4.72	3.98	14.63	39.62	29.93	1.33	9.17
0.68	18.27	14.12	0.95	1.13	1.08	1.33	6.9	0.36	2.5	0.26	20.68
NA	NA	NA	NA	NA	0.65	1.96	NA	NA	NA	NA	NA

## Sheet: y
p2	p3	p4	p5	p6	p7	p8	p9	p10	p11	p12	p13
0	1	7	4	0	5	1	0	0	0	0	0
0	0	0	0	0	0	0	0	0	0	0	0
0	3	3	6	1	1	0	0	2	0	0	3
0	0	0	0	2	0	9	0	0	0	0	0
1	0	0	0	0	12	0	0	0	0	0	0
0	0	0	0	0	0	0	0	0	0	0	0
0	1	2	1	2	1	4	0	1	0	1	0
0	0	0	0	0	0	0	0	5	1	0	2
0	0	0	0	0	0	1	6	13	8	0	0
0	0	0	0	0	2	11	0	0	0	0	0
0	1	0	2	0	0	0	0	1	0	0	0
1	0	0	0	0	6	5	0	0	0	0	0
0	0	0	0	0	0	0	0	0	0	0	0
0	2	0	0	1	5	6	3	0	0	0	0
0	0	0	0	0	12	0	0	3	0	0	0
0	0	1	0	0	0	0	0	0	0	0	0
0	0	0	0	0	2	3	5	1	4	0	3
0	0	1	0	4	1	1	0	1	0	0	0
2	0	2	4	32	2	4	1	4	0	0	0
0	1	4	6	0	0	1	1	0	0	0	0
1	6	2	2	3	1	0	1	2	0	0	1
0	0	0	0	0	0	0	0	0	0	3	0
1	2	0	0	0	0	0	0	0	0	0	0
0	13	2	12	0	0	0	0	0	87	6	0
33	6	14	2	0	30	9	17	17	1	22	6
14	5	10	15	12	41	16	2	0	0	0	0
14	3	0	14	3	3	3	4	8	1	1	0
1	1	0	0	0	9	4	0	0	0	0	0
0	0	0	0	0	0	1	4	2	1	0	1
30	7	1	0	0	0	1	0	0	0	0	0
2	1	0	0	0	1	1	2	0	0	0	0
0	0	1	0	0	0	0	0	0	0	0	0
0	0	0	0	0	1	0	0	0	0	0	0
0	0	0	0	0	2	2	4	0	0	0	0
0	0	0	0	11	0	0	0	0	0	0	0
1	0	0	0	0	0	0	0	0	0	0	0
0	2	0	0	1	12	18	0	7	1	0	0
12	14	106	6	15	2	0	0	1	4	0	0
0	2	0	0	0	0	11	1	7	5	9	3
1	0	1	20	3	1	0	0	6	7	13	0
0	0	0	0	0	0	0	0	0	0	0	0
0	1	0	0	2	0	1	0	0	0	0	0
2	0	0	0	0	0	0	0	0	0	0	0
5	9	14	6	0	2	5	0	0	1	0	0
1	0	0	0	0	0	1	0	3	0	0	0
0	0	0	0	0	0	0	0	0	0	0	0
3	2	0	0	0	0	1	5	0	0	0	2
0	0	2	0	5	19	0	0	1	0	0	0
1	0	0	0	0	2	0	0	0	0	0	0
0	3	0	0	0	1	0	0	5	6	11	0
0	0	0	0	0	5	0	2	3	3	2	3
0	1	0	0	0	0	1	0	1	0	0	0
2	0	1	0	0	9	0	0	0	0	0	0
1	1	0	0	0	34	29	23	19	12	3	7
0	0	0	0	0	0	1	0	0	0	0	0
0	0	0	0	0	0	0	0	0	0	0	0
0	0	0	0	0	0	0	0	0	0	0	0
1	0	1	1	3	4	4	0	0	0	0	0
5	0	0	0	0	6	0	6	7	2	9	0
0	0	1	1	1	0	1	0	0	0	0	0
1	0	0	0	0	0	0	0	10	1	1	0
1	0	0	0	0	2	2	0	0	3	9	4
0	2	0	0	0	0	4	2	0	0	1	0
5	0	0	0	0	0	0	0	0	0	0	0
2	2	0	0	0	3	0	1	1	0	0	5
0	2	14	4	8	3	0	0	0	0	0	5
0	1	26	41	0	0	0	0	1	0	0	1
0	3	0	0	4	0	1	0	1	0	0	0
0	0	0	0	0	0	0	0	0	0	0	0
0	0	0	0	0	0	0	0	0	0	0	0
0	1	0	6	2	1	1	0	0	0	0	0
0	3	0	1	0	2	0	0	0	0	0	2
0	0	0	0	0	1	7	9	1	1	1	0
0	0	0	0	0	2	4	7	0	0	0	0
0	0	3	6	10	1	4	6	7	2	0	2
1	1	0	0	0	0	0	0	0	0	0	6
3	2	2	0	0	0	5	8	2	0	0	12
0	0	0	0	0	0	0	0	0	0	0	0
0	0	0	1	0	1	0	0	0	0	0	0
0	0	0	0	0	0	0	0	0	0	0	0
0	0	0	0	0	0	0	0	0	0	0	0
2	1	0	0	0	0	0	0	0	0	0	0
0	6	2	0	0	8	3	0	0	0	0	0
0	0	7	0	0	2	6	0	5	0	0	0
3	8	0	0	0	0	0	0	0	0	0	0
0	4	14	0	0	0	0	0	1	0	0	0
0	0	0	0	0	2	6	0	8	0	0	0
0	12	0	0	0	0	2	0	0	0	0	0
8	1	0	0	0	2	6	5	2	0	5	4
2	0	0	0	0	0	0	0	0	0	0	2
0	0	0	0	0	0	0	0	0	0	0	0
0	0	1	0	1	0	0	0	0	0	1	0
3	1	0	0	0	3	1	1	1	0	0	0
1	0	0	0	0	4	0	0	0	0	0	3
1	1	1	0	0	0	0	0	0	0	0	0
5	1	0	0	0	0	0	3	0	0	2	2
16	0	0	0	0	4	5	5	14	10	2	5
3	2	0	0	0	2	0	0	2	2	2	1
0	0	0	0	0	0	0	0	0	0	0	0
0	0	0	0	0	3	0	2	2	1	3	7
0	0	0	0	1	0	2	0	0	0	0	0
0	1	4	4	10	8	0	0	0	0	0	0
4	1	0	0	0	0	0	5	0	10	6	0
0	0	10	4	0	1	3	0	0	0	0	0
0	5	9	4	0	2	13	4	2	2	1	0
0	0	0	0	0	0	1	0	1	0	0	0
0	0	0	0	0	0	0	0	0	0	0	0
0	0	0	0	0	0	0	0	0	0	0	0
0	2	0	0	0	0	0	0	0	0	0	0
0	0	0	0	0	10	0	0	0	0	7	15
0	0	0	0	0	3	0	0	0	0	0	0
0	0	0	0	0	0	0	0	0	1	1	0
1	0	0	0	0	0	0	0	0	0	0	4
1	6	9	6	0	1	6	0	2	0	0	1
0	0	0	0	0	0	2	1	0	0	3	0
0	0	9	0	7	2	11	16	0	0	1	1
1	0	12	17	12	0	1	5	0	4	15	12
0	0	0	5	40	8	3	0	0	0	1	0
0	0	0	1	0	0	0	0	0	0	0	0
0	0	0	0	0	0	0	0	0	0	0	0
5	7	5	23	57	23	14	0	2	1	0	0
8	5	7	10	63	4	0	3	0	4	1	0
0	0	2	7	23	9	0	5	3	0	0	0
4	2	2	54	11	5	1	0	1	0	0	2
0	0	0	0	0	0	1	2	1	0	0	7
0	2	0	2	0	1	0	2	0	0	0	0
5	0	0	0	0	0	1	0	2	2	0	4
5	9	3	3	18	0	0	0	0	0	0	0
6	1	2	2	0	0	4	5	2	1	1	17
1	4	0	16	0	0	1	5	0	0	0	0
0	2	16	32	30	21	8	4	0	0	1	0
4	0	16	1	17	0	0	0	0	0	0	0
0	7	4	0	0	0	0	2	1	1	0	0
1	0	0	0	0	1	0	0	0	0	0	0
9	4	6	14	2	0	3	0	0	6	0	0
0	3	1	0	0	0	1	0	0	0	0	0
1	2	1	0	0	0	0	0	0	0	0	0
3	5	1	1	1	2	6	0	0	0	4	0
2	6	2	11	30	35	7	0	2	0	2	2
17	0	67	0	0	0	5	7	35	38	3	13
8	6	11	1	0	7	0	0	0	0	0	1
5	0	0	0	0	0	0	0	0	0	0	2
10	4	1	5	0	0	0	2	0	0	0	0
1	0	0	12	0	4	0	0	0	0	0	0
0	0	0	2	1	0	0	0	0	0	0	0
2	12	9	14	3	0	0	0	0	0	0	1
0	0	1	1	2	2	0	0	0	0	0	0
3	0	0	11	2	1	0	0	0	0	1	0
10	6	0	0	0	0	0	0	0	0	0	0
1	1	1	7	11	7	1	0	0	0	0	0
2	1	2	4	4	4	0	0	0	0	0	19
30	12	2	0	0	0	0	0	0	0	0	0
12	11	5	6	5	0	0	0	0	0	0	0
0	0	0	2	2	1	0	0	0	0	0	2
1	0	7	5	14	0	0	0	0	0	1	0
0	0	7	1	0	2	1	0	0	0	0	0
1	1	0	0	0	0	0	0	0	0	1	5
6	0	4	17	2	19	0	0	0	0	1	0
1	3	9	11	2	1	0	0	0	0	0	4
0	0	0	0	1	0	0	0	0	0	1	5
0	0	0	0	0	0	0	0	0	0	0	0
38	27	5	0	0	0	0	0	0	0	0	0
22	5	0	2	0	0	0	0	0	0	0	0
0	0	0	0	0	0	0	0	0	0	0	0
0	0	0	0	0	0	0	0	0	0	0	0
0	0	1	1	0	0	0	0	0	0	0	0
1	3	0	24	2	1	0	0	0	0	0	0
0	0	1	4	0	0	0	0	0	0	0	0
3	11	31	62	0	0	0	0	0	0	2	39
3	1	6	13	9	0	0	0	0	0	0	0
0	0	0	1	0	0	0	0	0	0	0	0
0	2	3	0	1	0	0	0	0	0	0	1
0	0	1	5	1	1	0	0	0	0	0	0
3	0	2	0	0	0	0	0	0	0	0	0
1	0	1	8	0	0	0	0	0	0	0	0
1	3	18	18	33	0	0	0	0	0	0	0
3	3	2	1	0	0	0	0	0	0	0	1
7	1	0	2	20	9	0	0	0	0	1	2
0	2	21	3	7	43	0	0	0	0	0	0
4	2	1	8	0	0	0	0	0	0	0	10

## Sheet: eff_trap_b
p2	p3	p4	p5	p6	p7	p8	p9	p10	p11	p12	p13
103	103	103	103	103	103	103	103	103	103	103	103
32	32	32	32	32	32	32	32	32	32	32	32
112	112	112	112	112	112	112	112	112	112	112	112
85	85	85	85	85	85	85	85	85	85	85	85
168	168	168	168	168	168	168	168	168	168	168	168
88	88	88	88	88	88	88	88	88	88	88	88
31	31	31	31	31	31	31	31	31	31	0	0
72	72	72	72	72	72	72	72	72	72	0	0
45	45	45	45	45	45	45	45	45	45	0	0
66	66	66	66	66	66	66	66	66	66	66	66
33	33	33	33	33	33	33	33	33	33	33	33
137	137	137	137	137	137	137	137	137	137	137	137
99	99	99	99	99	99	99	99	99	99	99	99
222	222	222	222	222	222	222	222	222	222	222	222
32	32	32	32	32	32	32	32	32	32	32	32
141	141	141	141	141	141	141	141	141	141	141	141
207	207	207	207	207	207	207	207	207	207	207	207
207	207	207	207	207	207	207	207	207	207	207	207
0	0	0	0	0	0	0	0	0	0	0	0
0	0	0	0	0	0	0	0	0	0	0	0
48	48	48	48	48	48	48	48	48	48	0	0
0	0	0	0	0	0	0	0	0	0	0	0
8	8	8	8	8	8	8	8	8	8	0	0
16	16	16	16	16	16	16	16	16	16	0	0
38	38	38	38	38	38	38	38	38	38	0	0
47	47	47	47	47	47	47	47	47	47	0	0
85	85	85	85	85	85	85	85	85	85	0	0
37	37	37	37	37	37	37	37	37	37	0	0
59	59	59	59	59	59	59	59	59	59	0	0
26	26	26	26	26	26	26	26	26	26	0	0
38	38	38	38	38	38	38	38	38	38	0	0
114	114	114	114	114	114	114	114	114	114	0	0
2	2	2	2	2	2	2	2	2	2	0	0
NA	NA	NA	NA	NA	NA	NA	NA	NA	NA	0	0

## Sheet: eff_trap_s
p2	p3	p4	p5	p6	p7	p8	p9	p10	p11	p12	p13
40	40	40	40	40	40	40	40	40	40	40	40
15	15	15	15	15	15	15	15	15	15	15	15
5	5	5	5	5	5	5	5	5	5	5	5
26	26	26	26	26	26	26	26	26	26	26	26
75	75	75	75	75	75	75	75	75	75	75	75
62	62	62	62	62	62	62	62	62	62	62	62
110	110	110	110	110	110	110	110	110	110	0	0
171	171	171	171	171	171	171	171	171	171	0	0
75	75	75	75	75	75	75	75	75	75	0	0
301	301	301	301	301	301	301	301	301	301	301	301
45	45	45	45	45	45	45	45	45	45	45	45
87	87	87	87	87	87	87	87	87	87	87	87
48	48	48	48	48	48	48	48	48	48	48	48
42	42	42	42	42	42	42	42	42	42	42	42
67	67	67	67	67	67	67	67	67	67	67	67
232	232	232	232	232	232	232	232	232	232	232	232
123	123	123	123	123	123	123	123	123	123	123	123
86	86	86	86	86	86	86	86	86	86	86	86
0	0	0	0	0	0	0	0	0	0	0	0
0	0	0	0	0	0	0	0	0	0	0	0
0	0	0	0	0	0	0	0	0	0	0	0
0	0	0	0	0	0	0	0	0	0	0	0
0	0	0	0	0	0	0	0	0	0	0	0
0	0	0	0	0	0	0	0	0	0	0	0
0	0	0	0	0	0	0	0	0	0	0	0
0	0	0	0	0	0	0	0	0	0	0	0
0	0	0	0	0	0	0	0	0	0	0	0
0	0	0	0	0	0	0	0	0	0	0	0
0	0	0	0	0	0	0	0	0	0	0	0
0	0	0	0	0	0	0	0	0	0	0	0
0	0	0	0	0	0	0	0	0	0	0	0
0	0	0	0	0	0	0	0	0	0	0	0
0	0	0	0	0	0	0	0	0	0	0	0
