# Supplementary material for: Simultaneous estimation of seasonal population density, habitat preference and catchability of wild boars based on camera data and harvest records
Source: PubMed Central journal article supplement (PMC7481676; doi:10.1098/rsos.200579), 2020-08-19
Supplement: rsos200579_review_history.pdf [file rsos200579_review_history.pdf]

## **Simultaneous estimation of seasonal population density, habitat preference and catchability of wild boars based on camera data and harvest records**

Yuichi Yokoyama, Yoshihiro Nakashima, Gota Yajima and Tadashi Miyashita

### **Article citation details**

*R. Soc. open sci.* **7**: 200579.

<http://dx.doi.org/10.1098/rsos.200579>

### **Review timeline**

Original submission: 5 April 2020  
1st revised submission: 13 June 2020  
2nd revised submission: 18 July 2020  
Final acceptance: 21 July 2020

Note: Reports are unedited and appear as submitted by the referee. The review history appears in chronological order.

## Review History

### RSOS-200579.R0 (Original submission)

#### Review form: Reviewer 1

**Is the manuscript scientifically sound in its present form?**

Yes

**Are the interpretations and conclusions justified by the results?**

Yes

**Is the language acceptable?**

Yes

**Do you have any ethical concerns with this paper?**

No

**Have you any concerns about statistical analyses in this paper?**

No

## Recommendation?

Accept with minor revision (please list in comments)

## Comments to the Author(s)

The authors developed a model for simultaneous estimation of seasonal changes in different parameters for an example wild boar population in Japan. The model is a combination of the random encounter model and the staying time model and includes harvest records and trap cam data to estimate wild boar density on a broad spatial and seasonal scale.

It is an interesting manuscript with a timely topic. The topic is very important from the management point of view, because wild boar can impose heavy impacts on biodiversity and human activities. I think that this manuscript can be a major contribution to the research field. The manuscript is also in general well-structured and clear.

Still, I think that there are some revisions required.

I start with some major concerns:

1. I think that this manuscript is written as a standard research paper right now but has the potential to be written up as a more methodological paper. At the moment the authors mention that they introduce a novel statistical framework, but as reader you do not get the feeling that this is the main focus. I would advise restructuring the manuscript and put the main focus on the method development and using the wild boar population as a case study. Annotations in the attached r-script can help to make it reproducible for researchers dealing with similar topics/challenges. That will also involve that the advantages (“simultaneous estimation”) of this novel statistical framework get more attention. The authors mention it, but in my opinion it misses some depth and details. It seems that the simultaneous estimation is one major advantage, but it gets a bit lost in the biological interpretation of the case study (wild boar population). I think that by restructuring it to a “methodological paper”, the authors can reach a much broader audience of researchers dealing with harvest species in general.
2. This leads me directly to the next feedback point. At the moment the authors show that this “novel statistical framework” can be used for harvest species. But couldn't they expand/generalize it for species that need to be protected? The authors could also reach conservationists by showing how this method could be used for an endangered species for instance. Proper and reliable density estimation are also of huge importance for endangered species.
3. I am a bit concerned to what extent this model can be used by managers/researcher that do not have harvest records/trapping data, but only rely on camera trap data for instance. It seems that in Japan trapping records are important measure to control the population of wild boar, however, in Europe, as I know, hunting plays most important role and trapping is not allowed to control the population. That makes it difficult to translate this approach to a European situation. I would advise that the authors elaborate this issue (challenges and limitations for generalization of the statistical framework) in a separate section of the manuscript. In addition, adding information about a more general use will make it much more interesting to a broader public. I also miss this aspect in the last section of the manuscript about management implications. Can this model be used if no trapping data are available? How would I need to deal with it?
4. One confusing thing for the reader is that the authors switch between the terms “harvest record” and “trapping records”. They need to be consistent with it to not confuse the reader. In addition, it would be good to explain “harvest record” already shortly in the introduction, since it also appears in figure 1 (in the introduction). To me the difference between hunting bag and harvest record was not clear in the beginning. Defining harvest record will help the reader a lot.

5. I am a bit concerned about the fact that the authors did not include more age classes. They used only juveniles (<4 months) and adults (>4 months). As mentioned in my specific comments below, I would add yearlings because we cannot be certain that adults and yearlings do not differ in their habitat use, activity pattern and catchability.

6. I would also recommend to the authors to make clearer in the result section that the analysis were conducted on different spatial scales. At the moment it seems that some interpretations from the results are not correct, however, after reading carefully the methods again it becomes clear. As an example. In the summary, the authors mention the habitat preference of forests adjacent to abandoned fields. From the result section, this conclusion does not become really clear, still I am certain that the analysis were done on this.

7. A bit a minor remark, but since it is a general remark and not mentioned in specific minor comments: In general I would rather refer to "landscape variables" than "environmental variables", since environmental can be much broader and are less specific. Landscape gives the reader a more concrete idea of what is meant.

You find my specific (minor) comments below. I hope they be useful

Minor comments:

Page 2:

L40: instead of ";" – sign, I would advise a point as end of the sentence.

L44: evaluated "as an example population". I would add this to make it clearer for the reader.

L45: mainly due to harvesting

L45-L46: I do not see where this conclusion/result come from in your result section. In your results, you do not say that forests adjacent to abandoned fields are preferred and I don't think that you analysed this. If you did so, please make it clear to the reader.

L47: so throughout the season? I would add this in the sentence to make it clearer to the reader.

L50: for me it sounds that attractiveness of trap bait and activity changes in response to food scarcity is similar or at least closely related. I would rather write: ..., which probably reflected changes in the attractiveness of the trap bait due to activity changes in response to food scarcity.

Page 3:

L3: I advise putting keywords in alphabetical order.

L9: I would recommend mentioning some example mammal populations in brackets.

L16: I think I understand what you mean by field signs but maybe short elaboration is better.

Give an example for instance. I am not sure if field sign is the most appropriate word here.

L27: what is the difference between hunting bag and harvest record? I would have expected that it is the same. Thus, I would advise explaining the definition of harvest record already in an early stage since it is also used in the title.

L41: can you elaborate a bit more which parameters for instance are estimated by the camera trap data so that it is better to understand for a reader without the background knowledge of the REST model?

L51: You can even put it in a broader context. Not only in Japan but worldwide wild boar are causing damage. You could start with the fact that worldwide wild boar are causing damage with some countries as example and then narrow down to also in Japan they are causing damage and continue your story. That makes it maybe even more interesting for a broader public.

L52: "As abandonment of agricultural fields increases due to human population aging, sites preferred by wild boar, including abandoned fields and bamboo forests, have been increasing, thereby leading to crop damage near residential areas. This sentence is not really clear to me. It is a long sentence and a bit confusing. I would recommend rephrasing it.

Page 4:

L2: delete "the" in front of "environmental conditions".

L2-L9: that paragraph is a bit confusing to me. I think the main points you want to make is that catchability, population size as well as habitat use change spatially and seasonally. Because you

mention the reason for two of the factors (habitat use and population size) in between of the enumeration of the three parameters the readers gets a bit confused. I would advise rephrasing this paragraph.

L17: Why does simultaneous estimation in a Bayesian framework results in less error? I would recommend giving some additional explanation for this. Does not need to be long, but one addition sentence may help to get more clarity here.

L20: You mention here trapping records. I guess that this is the same as harvest records? But that is a guess and not really clear. I would advise using consistent words for it. And also some additional information about it. I was wondering for instance how sure you are about the fact that trapping by different municipalities and during different seasons was conducted with a constant effort? If that is an assumption you have to be quite certain about it, because I think that this can have huge impact on the results if it is not conducted with constant effort. Otherwise it might be really similar to hunting bag? I see now that you mention the trapping effort in the methods. That's good, but I would say, make sure that the reader knows here already that you take different trapping effort into account. Simply one short additional sentence should be enough.

L24-L29: I would rephrase this last part of the introduction. At the moment it feels a bit lost from the earlier paragraph. I would recommend something like: "Based on seasonal dynamics of the three parameters, we proposed an effective trapping strategy for sites and timing of trap placement on a landscape level for an example study area in the southern part of Chiba prefecture, central Japan." By simply switching first and last part of your paragraph it better links to the earlier paragraph.

Page 5:

L1: There seems to be a clear distinction between hunting and trapping. I think that this needs to be clearer for the reader at an early stage. I start now understanding that there is a difference, but it can be much easier for the reader if it is explained clearly at the beginning of the manuscript. I think that it is not so common to have trapping (as you define it) next to hunting methods for wild boar control. At least not in Europe. Thus, I guess that European readers may be a bit confused here.

L6-L11: I think that you can better combine those two sentences. Now it seems a bit that you rephrase the same sentence again.

L14: If I understand correctly you distinguished between juveniles (0-4 months) and adults (>4 months). Wouldn't you expect differences in catchability and habitat use between piglets (<13 months), sub-adults/yearlings (13-24 months old individuals) and adults (>24 months old individuals) as well? I understand if the distinction of other age classes only on camera traps is not possible but I think that it is important to mention this possible limitation of the study here.

L21: where the camera traps randomly distributed throughout the area? I guess so because you used the Rowcliffe method, but I don't see that you mention it in this paragraph.

L35: "The environmental variable was based on land use data..." □ add "was based" to your sentence.

L37: add "average" home range? That is probably more appropriate.

L45: I think that it is clearer if you write "... six landscape elements..." instead of "six environmental elements".

L60: see my comments on the age classes before. I think some additional explanation is necessary why you did not distinguish between yearlings and adults as well. Especially when you have trapping data more than only the two age classes you distinguish may be available.

Page 6:

L9: replace "rest were" by "remaining percentage was".

L29: what is the distribution of the staying time? is there a lot of variation? I would like to see a histogram of the staying time variable in the supplementary material.

Page 8:

L17: Put posterior distributions in the supplemental material please.

L28: rather than “environmental variables”, I would name it “landscape variables”. That is more precise and clearer to the reader.

L39-41: I would put those two lines in the methods instead of in the results.

Page 9:

L27: “simultaneous estimation”. Is that one of the major advantages of this technique/tool that you used here? If so, I would make that clear to the reader. At the moment it pops up in the title and here in the first sentence of discussion, but to me it is not really clear if that is an important point or not. Needs some clarification here. Ok, I see now in the next sentences of the discussion that you mention the advantages. I would already see those points in the introduction (when elaborating the problem).

L29: delete “quite” in sentence “quite useful”. It is useful!

L40: I miss a bit more in-depth detail about how exactly this methods shows advantages. Why and how are parameter estimates more reliable?

L45: refer to the reports. How do we know what is the “correct” density? How do we know if those estimates are more reliable than others, which are also estimated? That is not explained enough here and should be more convincing.

L60: can you add an overview of number of cameras in each landscape element in the study area (in supplemental material) so that you can underline your word “mainly” by a number/percentage. That makes your sentence more convincing.

Page 10:

L4: ON average. Not “in average”.

Page 11:

L20: Can you also mention management implications for countries that do not use trapping as control measure for the population?

L39-L46: As mentioned in my general comments, you can put much more focus on this last paragraph in your introduction and make it much more interesting for a broader public.

Page 12:

L10: reference nr 17 populationabundance should be two separate words.

Page 15:

Figure 1: What are the boxes and circles indicating? Mention it in the figure description. I anyway need some additional explanation for figure 1. When you only read the introduction where the first time is referred to figure 1 and by having only those information from introduction and figure description it is difficult to understand the figure. For instance, what is meant with density/mesh? I would advise either give additional explanation in introduction and/or figure description or make an easier graphical representation for the introduction.

Page 16:

L 50: Figure 4: is juvenile density never below adult density or not visible in month December-April for the juveniles because it lies below the density of the adults? If the latter is the case I would advise to use lines instead of filling the surface. Wouldn't be nicer to add also the bars in the two different colors (light and dark grey) for the two age classes? What is the reason to use the 50% credible interval and not a 95% confidence interval or a standard error?

Page 17:

L20: put the x-axis with the month at the bottom (at  $y=-1$  for instance) so that it is easier to read and not all the months names are below the lines and points. This makes the graph a bit confusing.

L54: “throughout the year” instead of “through a year”.

Supporting information:

L14: typing error: “monitoring”.

L20: Fig. S4: b) y axis is entitled with number of videos with two most left graphs, but has frequency on y-axis for the two most right and two central graphs. I think that you should remove the "frequency" on the y-axis, as it is also removed in (a). I don't understand in the figure description what you mean with y-values of circular points in the figures. I don't see any circular points.

L26: In reference Rowcliffe et al, (2014) is missing.

## Review form: Reviewer 2

**Is the manuscript scientifically sound in its present form?**

Yes

**Are the interpretations and conclusions justified by the results?**

Yes

**Is the language acceptable?**

Yes

**Do you have any ethical concerns with this paper?**

No

**Have you any concerns about statistical analyses in this paper?**

Yes

**Recommendation?**

Major revision is needed (please make suggestions in comments)

**Comments to the Author(s)**

Dear authors,

I have found you work timely and interesting. My main concern is the potential pseudoreplication in your experimental design. I think that the incorporation of the camera id as a random term (e.g., intercept), will improve your Bayesian modelling preventing from getting spurious effects (see, Paul-Christian Bürkner. 2020. Package 'brms' 2.12.0 version). Other minor comments have been included in the pdf (Appendix A).

I hope that my comments will be useful for your investigation

Yours sincerely

## Decision letter (RSOS-200579.R0)

We hope you are keeping well at this difficult and unusual time. We continue to value your support of the journal in these challenging circumstances. If Royal Society Open Science can assist you at all, please don't hesitate to let us know at the email address below.

Dear Dr Miyashita,

The editors assigned to your paper ("Simultaneous estimation of seasonal population density, habitat preference, and catchability of wild boars based on camera data and harvest records") have now received comments from reviewers. We would like you to revise your paper in

accordance with the referee and Associate Editor suggestions which can be found below (not including confidential reports to the Editor). Please note this decision does not guarantee eventual acceptance.

Please submit a copy of your revised paper before 19-Jun-2020. Please note that the revision deadline will expire at 00.00am on this date. If we do not hear from you within this time then it will be assumed that the paper has been withdrawn. In exceptional circumstances, extensions may be possible if agreed with the Editorial Office in advance. We do not allow multiple rounds of revision so we urge you to make every effort to fully address all of the comments at this stage. If deemed necessary by the Editors, your manuscript will be sent back to one or more of the original reviewers for assessment. If the original reviewers are not available, we may invite new reviewers.

To revise your manuscript, log into <http://mc.manuscriptcentral.com/rsos> and enter your Author Centre, where you will find your manuscript title listed under "Manuscripts with Decisions." Under "Actions," click on "Create a Revision." Your manuscript number has been appended to denote a revision. Revise your manuscript and upload a new version through your Author Centre.

When submitting your revised manuscript, you must respond to the comments made by the referees and upload a file "Response to Referees" in "Section 6 - File Upload". Please use this to document how you have responded to the comments, and the adjustments you have made. In order to expedite the processing of the revised manuscript, please be as specific as possible in your response.

In addition to addressing all of the reviewers' and editor's comments please also ensure that your revised manuscript contains the following sections as appropriate before the reference list:

- Ethics statement (if applicable)

If your study uses humans or animals please include details of the ethical approval received, including the name of the committee that granted approval. For human studies please also detail whether informed consent was obtained. For field studies on animals please include details of all permissions, licences and/or approvals granted to carry out the fieldwork.

- Data accessibility

It is a condition of publication that all supporting data are made available either as supplementary information or preferably in a suitable permanent repository. The data accessibility section should state where the article's supporting data can be accessed. This section should also include details, where possible of where to access other relevant research materials such as statistical tools, protocols, software etc can be accessed. If the data have been deposited in an external repository this section should list the database, accession number and link to the DOI for all data from the article that have been made publicly available. Data sets that have been deposited in an external repository and have a DOI should also be appropriately cited in the manuscript and included in the reference list.

If you wish to submit your supporting data or code to Dryad (<http://datadryad.org/>), or modify your current submission to dryad, please use the following link:

<http://datadryad.org/submit?journalID=RSOS&manu=RSOS-200579>

- Competing interests

Please declare any financial or non-financial competing interests, or state that you have no competing interests.

- Authors' contributions

All submissions, other than those with a single author, must include an Authors' Contributions section which individually lists the specific contribution of each author. The list of Authors

should meet all of the following criteria; 1) substantial contributions to conception and design, or acquisition of data, or analysis and interpretation of data; 2) drafting the article or revising it critically for important intellectual content; and 3) final approval of the version to be published.

All contributors who do not meet all of these criteria should be included in the acknowledgements.

We suggest the following format:

AB carried out the molecular lab work, participated in data analysis, carried out sequence alignments, participated in the design of the study and drafted the manuscript; CD carried out the statistical analyses; EF collected field data; GH conceived of the study, designed the study, coordinated the study and helped draft the manuscript. All authors gave final approval for publication.

- Acknowledgements

Please acknowledge anyone who contributed to the study but did not meet the authorship criteria.

- Funding statement

Please list the source of funding for each author.

Once again, thank you for submitting your manuscript to Royal Society Open Science and I look forward to receiving your revision. If you have any questions at all, please do not hesitate to get in touch.

Kind regards,  
Andrew Dunn  
Royal Society Open Science Editorial Office  
Royal Society Open Science  
openscience@royalsociety.org

Associate Editor's comments:

Two reviewers have provided feedback on your work. As there are a number of queries that should be addressed in your revision, please ensure you fully respond to these in your revised manuscript and accompanying response to reviewers document.

Reviewers' Comments to Author:

Reviewer: 1

Comments to the Author(s)

The authors developed a model for simultaneous estimation of seasonal changes in different parameters for an example wild boar population in Japan. The model is a combination of the random encounter model and the staying time model and includes harvest records and trap cam data to estimate wild boar density on a broad spatial and seasonal scale.

It is an interesting manuscript with a timely topic. The topic is very important from the management point of view, because wild boar can impose heavy impacts on biodiversity and human activities. I think that this manuscript can be a major contribution to the research field. The manuscript is also in general well-structured and clear.

Still, I think that there are some revisions required.

I start with some major concerns:



1. I think that this manuscript is written as a standard research paper right now but has the potential to be written up as a more methodological paper. At the moment the authors mention that they introduce a novel statistical framework, but as reader you do not get the feeling that this is the main focus. I would advise restructuring the manuscript and put the main focus on the method development and using the wild boar population as a case study. Annotations in the attached r-script can help to make it reproducible for researchers dealing with similar topics/challenges. That will also involve that the advantages (“simultaneous estimation”) of this novel statistical framework get more attention. The authors mention it, but in my opinion it misses some depth and details. It seems that the simultaneous estimation is one major advantage, but it gets a bit lost in the biological interpretation of the case study (wild boar population). I think that by restructuring it to a “methodological paper”, the authors can reach a much broader audience of researchers dealing with harvest species in general.

2. This leads me directly to the next feedback point. At the moment the authors show that this “novel statistical framework” can be used for harvest species. But couldn't they expand/generalize it for species that need to be protected? The authors could also reach conservationists by showing how this method could be used for an endangered species for instance. Proper and reliable density estimation are also of huge importance for endangered species.

3. I am a bit concerned to what extent this model can be used by managers/researcher that do not have harvest records/trapping data, but only rely on camera trap data for instance. It seems that in Japan trapping records are important measure to control the population of wild boar, however, in Europe, as I know, hunting plays most important role and trapping is not allowed to control the population. That makes it difficult to translate this approach to a European situation. I would advise that the authors elaborate this issue (challenges and limitations for generalization of the statistical framework) in a separate section of the manuscript. In addition, adding information about a more general use will make it much more interesting to a broader public. I also miss this aspect in the last section of the manuscript about management implications. Can this model be used if no trapping data are available? How would I need to deal with it?

4. One confusing thing for the reader is that the authors switch between the terms “harvest record” and “trapping records”. They need to be consistent with it to not confuse the reader. In addition, it would be good to explain “harvest record” already shortly in the introduction, since it also appears in figure 1 (in the introduction). To me the difference between hunting bag and harvest record was not clear in the beginning. Defining harvest record will help the reader a lot.

5. I am a bit concerned about the fact that the authors did not include more age classes. They used only juveniles (<4 months) and adults (>4 months). As mentioned in my specific comments below, I would add yearlings because we cannot be certain that adults and yearlings do not differ in their habitat use, activity pattern and catchability.

6. I would also recommend to the authors to make clearer in the result section that the analysis were conducted on different spatial scales. At the moment it seems that some interpretations from the results are not correct, however, after reading carefully the methods again it becomes clear. As an example. In the summary, the authors mention the habitat preference of forests adjacent to abandoned fields. From the result section, this conclusion does not become really clear, still I am certain that the analysis were done on this.

7. A bit a minor remark, but since it is a general remark and not mentioned in specific minor comments: In general I would rather refer to “landscape variables” than “environmental variables”, since environmental can be much broader and are less specific. Landscape gives the reader a more concrete idea of what is meant.

You find my specific (minor) comments below. I hope they be useful

Minor comments:

Page 2:

L40: instead of “;” – sign, I would advise a point as end of the sentence.

L44: evaluated “as an example population”. I would add this to make it clearer for the reader.

L45: mainly due to harvesting

L45-L46: I do not see where this conclusion/result come from in your result section. In your results, you do not say that forests adjacent to abandoned fields are preferred and I don't think that you analysed this. If you did so, please make it clear to the reader.

L47: so throughout the season? I would add this in the sentence to make it clearer to the reader.

L50: for me it sounds that attractiveness of trap bait and activity changes in response to food scarcity is similar or at least closely related. I would rather write: ..., which probably reflected changes in the attractiveness of the trap bait due to activity changes in response to food scarcity.

Page 3:

L3: I advise putting keywords in alphabetical order.

L9: I would recommend mentioning some example mammal populations in brackets.

L16: I think I understand what you mean by field signs but maybe short elaboration is better.

Give an example for instance. I am not sure if field sign is the most appropriate word here.

L27: what is the difference between hunting bag and harvest record? I would have expected that it is the same. Thus, I would advise explaining the definition of harvest record already in an early stage since it is also used in the title.

L41: can you elaborate a bit more which parameters for instance are estimated by the camera trap data so that it is better to understand for a reader without the background knowledge of the REST model?

L51: You can even put it in a broader context. Not only in Japan but worldwide wild boar are causing damage. You could start with the fact that worldwide wild boar are causing damage with some countries as example and then narrow down to also in Japan they are causing damage and continue your story. That makes it maybe even more interesting for a broader public.

L52: “As abandonment of agricultural fields increases due to human population aging, sites preferred by wild boar, including abandoned fields and bamboo forests, have been increasing, thereby leading to crop damage near residential areas. This sentence is not really clear to me. It is a long sentence and a bit confusing. I would recommend rephrasing it.

Page 4:

L2: delete “the” in front of “environmental conditions”.

L2-L9: that paragraph is a bit confusing to me. I think the main points you want to make is that catchability, population size as well as habitat use change spatially and seasonally. Because you mention the reason for two of the factors (habitat use and population size) in between of the enumeration of the three parameters the readers gets a bit confused. I would advise rephrasing this paragraph.

L17: Why does simultaneous estimation in a Bayesian framework results in less error? I would recommend giving some additional explanation for this. Does not need to be long, but one addition sentence may help to get more clarity here.

L20: You mention here trapping records. I guess that this is the same as harvest records? But that is a guess and not really clear. I would advise using consistent words for it. And also some additional information about it. I was wondering for instance how sure you are about the fact that trapping by different municipalities and during different seasons was conducted with a constant effort? If that is an assumption you have to be quite certain about it, because I think that this can have huge impact on the results if it is not conducted with constant effort. Otherwise it might be really similar to hunting bag? I see now that you mention the trapping effort in the methods. That's good, but I would say, make sure that the reader knows here already that you take different trapping effort into account. Simply one short additional sentence should be enough.

L24-L29: I would rephrase this last part of the introduction. At the moment it feels a bit lost from the earlier paragraph. I would recommend something like: “Based on seasonal dynamics of the

three parameters, we proposed an effective trapping strategy for sites and timing of trap placement on a landscape level for an example study area in the southern part of Chiba prefecture, central Japan." By simply switching first and last part of your paragraph it better links to the earlier paragraph.

Page 5:

L1: There seems to be a clear distinction between hunting and trapping. I think that this needs to be clearer for the reader at an early stage. I start now understanding that there is a difference, but it can be much easier for the reader if it is explained clearly at the beginning of the manuscript. I think that it namely not so common to have trapping (as you define it) next to hunting methods for wild boar control. At least not in Europe. Thus, I guess that European readers may be a bit confused here.

L6-L11: I think that you can better combine those two sentences. Now it seems a bit that you rephrase the same sentence again.

L14: If I understand correctly you distinguished between juveniles (0-4 months) and adults (>4months). Wouldn't you expect differences in catchability and habitat use between piglets (<13 months), sub-adults/yearlings (13-24 months old individuals) and adults (>24 months old individuals) as well? I understand if the distinction of other age classes only on camera traps is not possible but I think that it is important to mention this possible limitation of the study here.

L21: where the camera traps randomly distributed throughout the area? I guess so because you used the Rowcliffe method, but I don't see that you mention it in this paragraph.

L35: "The environmental variable was based on land use data..." □ add "was based" to your sentence.

L37: add "average" home range? That is probably more appropriate.

L45: I think that it is clearer if you write "... six landscape elements..." instead of "six environmental elements".

L60: see my comments on the age classes before. I think some additional explanation is necessary why you did not distinguish between yearlings and adults as well. Especially when you have trapping data more than only the two age classes you distinguish may be available.

Page 6:

L9: replace "rest were" by "remaining percentage was".

L29: what is the distribution of the staying time? is there a lot of variation? I would like to see a histogram of the staying time variable in the supplementary material.

Page 8:

L17: Put posterior distributions in the supplemental material please.

L28: rather than "environmental variables", I would name it "landscape variables". That is more precise and clearer to the reader.

L39-41: I would put those two lines in the methods instead of in the results.

Page 9:

L27: "simultaneous estimation". Is that one of the major advantages of this technique/tool that you used here? If so, I would make that clear to the reader. At the moment it pops up in the title and here in the first sentence of discussion, but to me it is not really clear if that is an important point or not. Needs some clarification here. Ok, I see now in the next sentences of the discussion that you mention the advantages. I would already see those points in the introduction (when elaborating the problem).

L29: delete "quite" in sentence "quite useful". It is useful!

L40: I miss a bit more in-depth detail about how exactly this methods shows advantages. Why and how are parameter estimates more reliable?

L45: refer to the reports. How do we know what is the "correct" density? How do we know if those estimates are more reliable than others, which are also estimated? That is not explained enough here and should be more convincing.

L60: can you add and overview of number of cameras in each landscape element in the study area (in supplemental material) so that you can underline your word “mainly” by a number/percentage. That makes your sentence more convincing.

Page 10:

L4: ON average. Not “in average”.

Page 11:

L20: Can you also mention management implications for countries that do not use trapping as control measure for the population?

L39-L46: As mentioned in my general comments, you can put much more focus on this last paragraph in your introduction and make it much more interesting for a broader public.

Page 12:

L10: reference nr 17 populationabundance should be two separate words.

Page 15:

Figure 1: What are the boxes and circles indicating? Mention it in the figure description. I anyway need some addition explanation for figure 1. When you only read the introduction where the first time is referred to figure 1 and by having only those information from introduction and figure description it is difficult to understand the figure. For instance, what is meant with density/mesh? I would advise either give additional explanation in introduction and/or figure description or make an easier graphical representation for the introduction.

Page 16:

L 50: Figure 4: is juvenile density never below adult density or not visible in month December-April for the juveniles because it lies below the density of the adults? If the latter is the case I would advise to use lines instead of filling the surface. Wouldn't be nicer to add also the bars in the two different colors (light and dark grey) for the two age classes? What is the reason to use the 50% credible interval and not a 95% confidence interval or a standard error?

Page 17:

L20: put the x-axis with the month at the bottom (at  $y=-1$  for instance) so that it is easier to read and not all the months names are below the lines and points. This makes the graph a bit confusing.

L54: “throughout the year” instead of “through a year”.

Supporting information:

L14: typing error: “monitoring”.

L20: Fig. S4: b) y axis is entitled with number of videos with two most left graphs, but has frequency on y-axis for the two most right and two central graphs. I think that you should remove the “frequency” on the y-axis, as it is also removed in (a). I don't understand in the figure description what you mean with y-values of circular points in the figures. I don't see any circular points.

L26: In reference Rowcliffe et al, (2014) is missing.

Reviewer: 2

Comments to the Author(s)

Dear authors,

I have found you work timely and interesting. My main concern is the potential pseudoreplication in your experimental design. I think that the incorporation of the camera id as a random term (e.g., intercept), will improve your Bayesian modelling preventing from getting spurious effects (see, Paul-Christian Bürkner. 2020. Package ‘brms’ 2.12.0 version).

Other minor comments have been included in the pdf.

I hope that my comments will be useful for your investigation  
Yours sincerely

## Author's Response to Decision Letter for (RSOS-200579.R0)

See Appendix B.

## RSOS-200579.R1 (Revision)

### Review form: Reviewer 1

**Is the manuscript scientifically sound in its present form?**

Yes

**Are the interpretations and conclusions justified by the results?**

Yes

**Is the language acceptable?**

Yes

**Do you have any ethical concerns with this paper?**

No

**Have you any concerns about statistical analyses in this paper?**

No

### **Recommendation?**

Accept with minor revision (please list in comments)

### **Comments to the Author(s)**

Dear authors,

You did a great job in improving the manuscript. I only have some minor comments on text parts that have been added in the revised version.

#### Minor comments:

Page 13:

Line 38: make clear that the reader understands the novelty of this approach. You say that it accounts for spatial and temporal heterogeneity in detectability. Maybe it would be good to add one sentence that in the previous approaches, this has not been done. I see that this is what you want to make say, but I would state it in an additional sentence.

Page 17:

Line 20: Put the table that you used as response to the comment from reviewer 2 in the supplement as well and refer to it here.

Page 22:

Line 27: What do you mean with "in seperation"? seperately is maybe a better word?

Line 29: You say that the density estimates become much more precise. Is it precise? Or do you mean accurate? You state it but you did not test (statistically) if the results are more precise/accurate right? I would rephrase this sentence a bit to reduce the chance of misinterpretation by the reader.

Line 30: "Of course our models can also be used for eradication...". Add also in the sentence for clarity.

## Review form: Reviewer 2

**Is the manuscript scientifically sound in its present form?**

Yes

**Are the interpretations and conclusions justified by the results?**

Yes

**Is the language acceptable?**

Yes

**Do you have any ethical concerns with this paper?**

No

**Have you any concerns about statistical analyses in this paper?**

No

**Recommendation?**

Accept as is

**Comments to the Author(s)**

..

## Decision letter (RSOS-200579.R1)

We hope you are keeping well at this difficult and unusual time. We continue to value your support of the journal in these challenging circumstances. If Royal Society Open Science can assist you at all, please don't hesitate to let us know at the email address below.

Dear Dr Miyashita:

On behalf of the Editors, I am pleased to inform you that your Manuscript RSOS-200579.R1 entitled "Simultaneous estimation of seasonal population density, habitat preference, and catchability of wild boars based on camera data and harvest records" has been accepted for publication in Royal Society Open Science subject to minor revision in accordance with the referee suggestions. Please find the referees' comments at the end of this email.

The reviewers and Subject Editor have recommended publication, but also suggest some minor revisions to your manuscript. Therefore, I invite you to respond to the comments and revise your manuscript.

- Ethics statement

If your study uses humans or animals please include details of the ethical approval received, including the name of the committee that granted approval. For human studies please also detail whether informed consent was obtained. For field studies on animals please include details of all permissions, licences and/or approvals granted to carry out the fieldwork.

- Data accessibility

It is a condition of publication that all supporting data are made available either as supplementary information or preferably in a suitable permanent repository. The data accessibility section should state where the article's supporting data can be accessed. This section should also include details, where possible of where to access other relevant research materials such as statistical tools, protocols, software etc can be accessed. If the data has been deposited in an external repository this section should list the database, accession number and link to the DOI for all data from the article that has been made publicly available. Data sets that have been deposited in an external repository and have a DOI should also be appropriately cited in the manuscript and included in the reference list.

If you wish to submit your supporting data or code to Dryad (<http://datadryad.org/>), or modify your current submission to dryad, please use the following link:

<http://datadryad.org/submit?journalID=RSOS&manu=RSOS-200579.R1>

- Competing interests

Please declare any financial or non-financial competing interests, or state that you have no competing interests.

- Authors' contributions

All submissions, other than those with a single author, must include an Authors' Contributions section which individually lists the specific contribution of each author. The list of Authors should meet all of the following criteria; 1) substantial contributions to conception and design, or acquisition of data, or analysis and interpretation of data; 2) drafting the article or revising it critically for important intellectual content; and 3) final approval of the version to be published.

All contributors who do not meet all of these criteria should be included in the acknowledgements.

We suggest the following format:

AB carried out the molecular lab work, participated in data analysis, carried out sequence alignments, participated in the design of the study and drafted the manuscript; CD carried out the statistical analyses; EF collected field data; GH conceived of the study, designed the study, coordinated the study and helped draft the manuscript. All authors gave final approval for publication.

- Acknowledgements

Please acknowledge anyone who contributed to the study but did not meet the authorship criteria.

- Funding statement

Please list the source of funding for each author.

Please note that we cannot publish your manuscript without these end statements included. We have included a screenshot example of the end statements for reference. If you feel that a given heading is not relevant to your paper, please nevertheless include the heading and explicitly state that it is not relevant to your work.

Because the schedule for publication is very tight, it is a condition of publication that you submit the revised version of your manuscript before 22-Jul-2020. Please note that the revision deadline

will expire at 00.00am on this date. If you do not think you will be able to meet this date please let me know immediately.

To revise your manuscript, log into <https://mc.manuscriptcentral.com/rsos> and enter your Author Centre, where you will find your manuscript title listed under "Manuscripts with Decisions". Under "Actions," click on "Create a Revision." You will be unable to make your revisions on the originally submitted version of the manuscript. Instead, revise your manuscript and upload a new version through your Author Centre.

When submitting your revised manuscript, you will be able to respond to the comments made by the referees and upload a file "Response to Referees" in "Section 6 - File Upload". You can use this to document any changes you make to the original manuscript. In order to expedite the processing of the revised manuscript, please be as specific as possible in your response to the referees.

When uploading your revised files please make sure that you have:

- 1) A text file of the manuscript (tex, txt, rtf, docx or doc), references, tables (including captions) and figure captions. Do not upload a PDF as your "Main Document".
- 2) A separate electronic file of each figure (EPS or print-quality PDF preferred (either format should be produced directly from original creation package), or original software format)
- 3) Included a 100 word media summary of your paper when requested at submission. Please ensure you have entered correct contact details (email, institution and telephone) in your user account
- 4) Included the raw data to support the claims made in your paper. You can either include your data as electronic supplementary material or upload to a repository and include the relevant doi within your manuscript
- 5) All supplementary materials accompanying an accepted article will be treated as in their final form. Note that the Royal Society will neither edit nor typeset supplementary material and it will be hosted as provided. Please ensure that the supplementary material includes the paper details where possible (authors, article title, journal name).

Supplementary files will be published alongside the paper on the journal website and posted on the online figshare repository (<https://figshare.com>). The heading and legend provided for each supplementary file during the submission process will be used to create the figshare page, so please ensure these are accurate and informative so that your files can be found in searches. Files on figshare will be made available approximately one week before the accompanying article so that the supplementary material can be attributed a unique DOI.

Once again, thank you for submitting your manuscript to Royal Society Open Science and I look forward to receiving your revision. If you have any questions at all, please do not hesitate to get in touch.

Kind regards,  
Andrew Dunn  
Royal Society Open Science Editorial Office  
Royal Society Open Science  
[openscience@royalsociety.org](mailto:openscience@royalsociety.org)

Reviewer comments to Author:  
Reviewer: 2

Comments to the Author(s)

..



Reviewer: 1

Comments to the Author(s)

Dear authors,

You did a great job in improving the manuscript. I only have some minor comments on text parts that have been added in the revised version.

Minor comments:

Page 13:

Line 38: make clear that the reader understands the novelty of this approach. You say that it accounts for spatial and temporal heterogeneity in detectability. Maybe it would be good to add one sentence that in the previous approaches, this has not been done. I see that this is what you want to make say, but I would state it in an additional sentence.

Page 17:

Line 20: Put the table that you used as response to the comment from reviewer 2 in the supplement as well and refer to it here.

Page 22:

Line 27: What do you mean with "in seperation"? seperately is maybe a better word?

Line 29: You say that the density estimates become much more precise. Is it precise? Or do you mean accurate? You state it but you did not test (statistically) if the results are more precise/accurate right? I would rephrase this sentence a bit to reduce the chance of misinterpretation by the reader.

Line 30: "Off course our models can also be used for eradication...". Add also in the sentence for clarity.

## Author's Response to Decision Letter for (RSOS-200579.R1)

See Appendix C.

## Decision letter (RSOS-200579.R2)

We hope you are keeping well at this difficult and unusual time. We continue to value your support of the journal in these challenging circumstances. If Royal Society Open Science can assist you at all, please don't hesitate to let us know at the email address below.

Dear Dr Miyashita,

It is a pleasure to accept your manuscript entitled "Simultaneous estimation of seasonal population density, habitat preference, and catchability of wild boars based on camera data and harvest records" in its current form for publication in Royal Society Open Science.

Please ensure that you send to the editorial office an editable version of your accepted manuscript, and individual files for each figure and table included in your manuscript. You can send these in a zip folder if more convenient. Failure to provide these files may delay the processing of your proof. You may disregard this request if you have already provided these files to the editorial office.

You can expect to receive a proof of your article in the near future. Please contact the editorial office ([openscience\\_proofs@royalsociety.org](mailto:openscience_proofs@royalsociety.org)) and the production office ([openscience@royalsociety.org](mailto:openscience@royalsociety.org)) to let us know if you are likely to be away from e-mail contact -- if you are going to be away, please nominate a co-author (if available) to manage the proofing process, and ensure they are copied into your email to the journal.

Due to rapid publication and an extremely tight schedule, if comments are not received, your paper may experience a delay in publication. Royal Society Open Science operates under a continuous publication model. Your article will be published straight into the next open issue and this will be the final version of the paper. As such, it can be cited immediately by other researchers. As the issue version of your paper will be the only version to be published I would advise you to check your proofs thoroughly as changes cannot be made once the paper is published.

Please see the Royal Society Publishing guidance on how you may share your accepted author manuscript at <https://royalsociety.org/journals/ethics-policies/media-embargo/>.

Thank you for your fine contribution. On behalf of the Editors of Royal Society Open Science, we look forward to your continued contributions to the Journal.

Kind regards,  
Royal Society Open Science Editorial Office  
Royal Society Open Science  
[openscience@royalsociety.org](mailto:openscience@royalsociety.org)

Follow Royal Society Publishing on Twitter: @RSocPublishing  
Follow Royal Society Publishing on Facebook:  
<https://www.facebook.com/RoyalSocietyPublishing.FanPage/>  
Read Royal Society Publishing's blog: <https://blogs.royalsociety.org/publishing/>

**Appendix A****ROYAL SOCIETY  
OPEN SCIENCE****Simultaneous estimation of seasonal population density,  
habitat preference, and catchability of wild boars based on  
camera data and harvest records**

|                               |                                                                                                                                                                                                                                                                                                               |
|-------------------------------|---------------------------------------------------------------------------------------------------------------------------------------------------------------------------------------------------------------------------------------------------------------------------------------------------------------|
| Journal:                      | <i>Royal Society Open Science</i>                                                                                                                                                                                                                                                                             |
| Manuscript ID                 | RSOS-200579                                                                                                                                                                                                                                                                                                   |
| Article Type:                 | Research                                                                                                                                                                                                                                                                                                      |
| Date Submitted by the Author: | 05-Apr-2020                                                                                                                                                                                                                                                                                                   |
| Complete List of Authors:     | Yokoyama, Yuichi; University of Tokyo, Graduate School of Agriculture and Life Sciences<br>Nakashima, Yoshihiro; Nihon University, College of Bioresource Science<br>Yajima, Gota; Nihon University, College of Bioresource Science<br>Miyashita, Tadashi; University of Tokyo, Agriculture and Life Sciences |
| Subject:                      | ecology < BIOLOGY, environmental science < BIOLOGY                                                                                                                                                                                                                                                            |
| Keywords:                     | wildlife management, population dynamics, habitat selection                                                                                                                                                                                                                                                   |
| Subject Category:             | Ecology, Conservation, and Global Change Biology                                                                                                                                                                                                                                                              |
|                               |                                                                                                                                                                                                                                                                                                               |

SCHOLARONE™  
Manuscripts

**Author-supplied statements**

Relevant information will appear here if provided.

***Ethics***

*Does your article include research that required ethical approval or permits?:*

This article does not present research with ethical considerations

*Statement (if applicable):*

Harvesting records used in this study were provided by local governments in Chiba prefecture, and the harvesting was conducted by the local governments under Wildlife Protection and Hunting Management Law in Japan.

***Data***

*It is a condition of publication that data, code and materials supporting your paper are made publicly available. Does your paper present new data?:*

Yes

*Statement (if applicable):*

The datasets supporting this article have been uploaded as part of the supplementary material. The details are, 1) R code, 2) readme file, 3) adult boar file, 4) juvenile boar file, 5) environmental file.

***Conflict of interest***

I/We declare we have no competing interests

*Statement (if applicable):*

CUST\_STATE\_CONFLICT :No data available.

***Authors' contributions***

This paper has multiple authors and our individual contributions were as below

*Statement (if applicable):*

YY carried out data analysis, drafted the manuscript; YN participated in the design of the study, collected field data, and helped data analysis; GY collected field data and analysed video recordings; TM participated in the design of the study and critically revised the manuscript. All authors gave final approval for publication and agree to be held accountable for the work performed therein.

---

## **Simultaneous estimation of seasonal population density, habitat preference, and catchability of wild boars based on camera data and harvest records**

**Yuichi Yokoyama<sup>1</sup>, Yoshihiro Nakashima<sup>2</sup>, Gota Yajima<sup>2</sup>, Tadashi Miyashita<sup>1</sup>**

*1 Graduate School of Agriculture and Life Sciences, University of Tokyo, Bunkyo Ward, Tokyo, 113-8657, Japan*

*2 College of Bioresource Science, Nihon University, Fujisawa, Kanagawa, 252-0880, Japan*

**Keywords:** population dynamics; random encounter and staying time model; seasonal habitat preference; *Sus scrofa*; ecosystem management

---

### **1. Summary**

Analyses of life history and population dynamics are essential for effective population control of wild mammals. We developed a model for the simultaneous estimation of seasonal changes in three parameters—population density, habitat preference, and trap catchability of target animals—based on camera-trapping data and harvest records. The random encounter and staying time model, with no need to individual recognition, is the core component of the model; by combining this model with harvest records, we estimated density at broad spatial scales and catchability by traps. Here, the wild boar population in central Japan was evaluated. We found that the estimated population density increased after the birth period and then decreased until the next birth period, due mainly to harvesting. Habitat preference changed seasonally, but forests adjacent to abandoned fields were generally preferred. These patterns can be explained by patterns of food availability and resting or nesting sites. Catchability by traps also changed seasonally, with relatively high values in the winter, which probably reflected changes in the attractiveness of the trap bait or activity changes in response to food scarcity. Based on these results, we proposed an effective trapping strategy for wild boars, focusing on when and where to set traps.

\*Author for correspondence: Tadashi Miyashita (tmiya@es.a.u-tokyo.ac.jp).

†Present address: Graduate School of Agriculture and Life Sciences, University of Tokyo, Bunkyo Ward, Tokyo, 113-8657, Japan

Keywords

1  
2 population dynamics; wildlife management; seasonal habitat preference; *Sus scrofa*; ecosystem management  
3  
4

## 5 6 2. Introduction 7

8  
9 Excessive increases in some mammal populations have a wide range of negative consequences, such as  
10 degradation of ecosystems [1], agricultural damage [2,3], and **disease transmission [4]**. Implementation of  
11 effective management strategies for wildlife populations requires detailed knowledge on the life history and  
12 population dynamics of the target species [5-8]. However, mammals in the wild are often cryptic with rare  
13 sightings; even their field signs are often difficult to find.  
14  
15  
16

17  
18 The wild boar (*Sus scrofa*), with its broad geographical range, is one such species [9,10]. It causes crop damage  
19 [11-13] and spreads disease to livestock [14,15]. Although population density and seasonal dynamics are key  
20 factors for the effective management of wild boar [16], conventional methods for estimating their numbers are  
21 not sufficiently precise or accurate and therefore a standard methodological framework is lacking [17].  
22 Estimating wild boar population sizes by direct observation is difficult due to the preference for dense  
23 understory shrubs and nocturnal and cautious behaviors [18,19]. Indirect indices, such as hunting bag  
24 statistics or pellet counts, have been used to estimate population density (e.g., 20-22), but these indices can be  
25 affected by several factors, including season, weather conditions, and visibility in habitats [17]. **They are thus**  
26 **context-dependent and not reliable due to seasonal and spatial variation.**  
27  
28  
29  
30  
31  
32  
33

34  
35 Camera traps represent a potential alternative for the reliable estimation of the absolute density of wild boars.  
36 Recently developed approaches to estimate animal density without individual recognition might be applicable  
37 to wild boars. Rowcliffe *et al.* [23] presented the random encounter model (REM) based on ideal gas models  
38 [24]. Nakashima, Fukasawa & Samejima [25] improved the feasibility of REM by developing the random  
39 encounter and staying time (REST) model, in which all required parameters are estimated exclusively by  
40 camera trap data. More recently, Nakashima, Hongo & Akomo-Okoue [26] have incorporated habitat  
41 covariates into the REST model, allowing for likelihood-based estimation of the relationship between habitats  
42 and animal density. This approach yields reliable density estimates at the landscape scale, accounting for  
43 spatial and temporal heterogeneity in animal detectability.  
44  
45  
46  
47  
48  
49

50  
51 In Japan, the spread of wild boar populations has caused serious agricultural damage [27]. Wild boars  
52 accounted for about 30% of total crop damage caused by wildlife in 2018 [28]. As abandonment of agricultural  
53 fields increases due to human population aging, sites preferred by wild boar, including abandoned fields and  
54 bamboo forests, have been increasing, thereby leading to crop damage near residential areas [29]. Box and  
55 snare traps are typically used to control wild boar populations [30], but trapping is based on empirical or  
56 anecdotal knowledge, as opposed to an informed and systematically designed approach. Moreover, the  
57 hunter population is aging and decreasing [31,32], emphasizing the need for higher trap catchability with less  
58  
59  
60

1  
2 effort. Catchability is affected by the environmental conditions and season [33,34]; accordingly, seasonal and  
3  
4 spatial variation in catchability need to be clarified at the landscape level. Furthermore, due to the high  
5  
6 fertility and omnivorous diet of wild boars [35], population size and habitat use are likely to change spatially  
7  
8 and seasonally within a given year. These comprehensive ecological factors should be incorporated into  
9  
10 management strategies for wild boar populations [11].

11  
12 We developed a model for the simultaneous estimation of seasonal changes in three parameters—population  
13  
14 density, habitat preference, and trap catchability of wild boars—by integrating the REST model and harvest  
15  
16 records (figure 1). Simultaneous estimation in a Bayesian framework results in less error than that associated  
17  
18 with independent estimates [36]. First, to estimate local density and seasonal habitat use, environmental  
19  
20 variables were incorporated into the REST model. Second, using estimated environmental parameters and  
21  
22 local density, we estimated population density at a large spatial scale, at which trapping records collected by  
23  
24 municipal governments are available. This allowed us to estimate catchability by box and snare traps in each  
25  
26 month. The field study area is in the southern part of Chiba prefecture, central Japan, where an isolated wild  
27  
28 boar population has been increasing since the 1980s, causing severe crop damage [37]. Based on seasonal  
29  
30 dynamics of the three parameters, we proposed an effective trapping strategy for the sites and timing of trap  
31  
32 placement in a landscape context.

### 34 35 36 37 38 39 40 41 42 43 44 45 46 47 48 49 50 51 52 53 54 55 56 57 58 59 60

## 3. Materials and Methods

### Study area and species

40  
41 The study area included four municipalities in Chiba prefecture, in eastern Japan (35°N, 140°E). The total size  
42  
43 of the study area was 799.6 km<sup>2</sup>, occupying about 15.5% of the prefecture. The climate was classified as warm  
44  
45 temperate, with a mean monthly temperature of 4°C–25°C and annual precipitation of 2,000–2,400 mm.  
46  
47 Forests, including broad-leaf forests (dominated by *Castanopsis sieboldii* and *Quercus* spp. with high acorn  
48  
49 production) and conifer plantations (*Cryptomeria japonica* and *Chamaecyparis obtusa*), accounted for about 60%  
50  
51 of the area, and farmlands composed mainly of paddy fields accounted for 20% of the study area [38]. Owing  
52  
53 to the high browsing pressure by sika deer, the forest understory vegetation is generally sparse [39], except for  
54  
55 abandoned fields where dense shrubs dominate. Bamboo forests, which provide food for wild boars, were  
56  
57 also common (3% of the study area). The landscape has a mosaic structure composed of different types of  
58  
59 forests, farmlands, and residential areas, with severe crop damage by wild boars from adjacent landscapes.  
60  
61  
62  
63  
64  
65  
66  
67  
68  
69  
70  
71  
72  
73  
74  
75  
76  
77  
78  
79  
80  
81  
82  
83  
84  
85  
86  
87  
88  
89  
90  
91  
92  
93  
94  
95  
96  
97  
98  
99  
100  
101  
102  
103  
104  
105  
106  
107  
108  
109  
110  
111  
112  
113  
114  
115  
116  
117  
118  
119  
120  
121  
122  
123  
124  
125  
126  
127  
128  
129  
130  
131  
132  
133  
134  
135  
136  
137  
138  
139  
140  
141  
142  
143  
144  
145  
146  
147  
148  
149  
150  
151  
152  
153  
154  
155  
156  
157  
158  
159  
160  
161  
162  
163  
164  
165  
166  
167  
168  
169  
170  
171  
172  
173  
174  
175  
176  
177  
178  
179  
180  
181  
182  
183  
184  
185  
186  
187  
188  
189  
190  
191  
192  
193  
194  
195  
196  
197  
198  
199  
200  
201  
202  
203  
204  
205  
206  
207  
208  
209  
210  
211  
212  
213  
214  
215  
216  
217  
218  
219  
220  
221  
222  
223  
224  
225  
226  
227  
228  
229  
230  
231  
232  
233  
234  
235  
236  
237  
238  
239  
240  
241  
242  
243  
244  
245  
246  
247  
248  
249  
250  
251  
252  
253  
254  
255  
256  
257  
258  
259  
260  
261  
262  
263  
264  
265  
266  
267  
268  
269  
270  
271  
272  
273  
274  
275  
276  
277  
278  
279  
280  
281  
282  
283  
284  
285  
286  
287  
288  
289  
290  
291  
292  
293  
294  
295  
296  
297  
298  
299  
300  
301  
302  
303  
304  
305  
306  
307  
308  
309  
310  
311  
312  
313  
314  
315  
316  
317  
318  
319  
320  
321  
322  
323  
324  
325  
326  
327  
328  
329  
330  
331  
332  
333  
334  
335  
336  
337  
338  
339  
340  
341  
342  
343  
344  
345  
346  
347  
348  
349  
350  
351  
352  
353  
354  
355  
356  
357  
358  
359  
360  
361  
362  
363  
364  
365  
366  
367  
368  
369  
370  
371  
372  
373  
374  
375  
376  
377  
378  
379  
380  
381  
382  
383  
384  
385  
386  
387  
388  
389  
390  
391  
392  
393  
394  
395  
396  
397  
398  
399  
400  
401  
402  
403  
404  
405  
406  
407  
408  
409  
410  
411  
412  
413  
414  
415  
416  
417  
418  
419  
420  
421  
422  
423  
424  
425  
426  
427  
428  
429  
430  
431  
432  
433  
434  
435  
436  
437  
438  
439  
440  
441  
442  
443  
444  
445  
446  
447  
448  
449  
450  
451  
452  
453  
454  
455  
456  
457  
458  
459  
460  
461  
462  
463  
464  
465  
466  
467  
468  
469  
470  
471  
472  
473  
474  
475  
476  
477  
478  
479  
480  
481  
482  
483  
484  
485  
486  
487  
488  
489  
490  
491  
492  
493  
494  
495  
496  
497  
498  
499  
500  
501  
502  
503  
504  
505  
506  
507  
508  
509  
510  
511  
512  
513  
514  
515  
516  
517  
518  
519  
520  
521  
522  
523  
524  
525  
526  
527  
528  
529  
530  
531  
532  
533  
534  
535  
536  
537  
538  
539  
540  
541  
542  
543  
544  
545  
546  
547  
548  
549  
550  
551  
552  
553  
554  
555  
556  
557  
558  
559  
560  
561  
562  
563  
564  
565  
566  
567  
568  
569  
570  
571  
572  
573  
574  
575  
576  
577  
578  
579  
580  
581  
582  
583  
584  
585  
586  
587  
588  
589  
590  
591  
592  
593  
594  
595  
596  
597  
598  
599  
600  
601  
602  
603  
604  
605  
606  
607  
608  
609  
610  
611  
612  
613  
614  
615  
616  
617  
618  
619  
620  
621  
622  
623  
624  
625  
626  
627  
628  
629  
630  
631  
632  
633  
634  
635  
636  
637  
638  
639  
640  
641  
642  
643  
644  
645  
646  
647  
648  
649  
650  
651  
652  
653  
654  
655  
656  
657  
658  
659  
660  
661  
662  
663  
664  
665  
666  
667  
668  
669  
670  
671  
672  
673  
674  
675  
676  
677  
678  
679  
680  
681  
682  
683  
684  
685  
686  
687  
688  
689  
690  
691  
692  
693  
694  
695  
696  
697  
698  
699  
700  
701  
702  
703  
704  
705  
706  
707  
708  
709  
710  
711  
712  
713  
714  
715  
716  
717  
718  
719  
720  
721  
722  
723  
724  
725  
726  
727  
728  
729  
730  
731  
732  
733  
734  
735  
736  
737  
738  
739  
740  
741  
742  
743  
744  
745  
746  
747  
748  
749  
750  
751  
752  
753  
754  
755  
756  
757  
758  
759  
760  
761  
762  
763  
764  
765  
766  
767  
768  
769  
770  
771  
772  
773  
774  
775  
776  
777  
778  
779  
780  
781  
782  
783  
784  
785  
786  
787  
788  
789  
790  
791  
792  
793  
794  
795  
796  
797  
798  
799  
800  
801  
802  
803  
804  
805  
806  
807  
808  
809  
810  
811  
812  
813  
814  
815  
816  
817  
818  
819  
820  
821  
822  
823  
824  
825  
826  
827  
828  
829  
830  
831  
832  
833  
834  
835  
836  
837  
838  
839  
840  
841  
842  
843  
844  
845  
846  
847  
848  
849  
850  
851  
852  
853  
854  
855  
856  
857  
858  
859  
860  
861  
862  
863  
864  
865  
866  
867  
868  
869  
870  
871  
872  
873  
874  
875  
876  
877  
878  
879  
880  
881  
882  
883  
884  
885  
886  
887  
888  
889  
890  
891  
892  
893  
894  
895  
896  
897  
898  
899  
900  
901  
902  
903  
904  
905  
906  
907  
908  
909  
910  
911  
912  
913  
914  
915  
916  
917  
918  
919  
920  
921  
922  
923  
924  
925  
926  
927  
928  
929  
930  
931  
932  
933  
934  
935  
936  
937  
938  
939  
940  
941  
942  
943  
944  
945  
946  
947  
948  
949  
950  
951  
952  
953  
954  
955  
956  
957  
958  
959  
960  
961  
962  
963  
964  
965  
966  
967  
968  
969  
970  
971  
972  
973  
974  
975  
976  
977  
978  
979  
980  
981  
982  
983  
984  
985  
986  
987  
988  
989  
990  
991  
992  
993  
994  
995  
996  
997  
998  
999  
1000

Crop damage caused by wild boars in the study area was about 730,000 USD in 2018 [40]. About 11300 wild boar individuals were removed by permitted trapping and hunting in 2018 in the study area, with a peak in late autumn to winter (Supplementary material figure S1). The hunting season lasts from November 15 to

February 15, and the number of hunted individuals accounted for about 3% of all individuals captured, indicating that trapping accounts for the majority of captures.

Most female wild boars in Japan give birth to a litter of about four piglets in average during May and June [41]; accordingly, the population size of wild boars can fluctuate considerably even within a year. Due to their omnivorous diet, wild boars are known to change their habitat use seasonally, depending on food availability [11,42]. In Japan, wild boars eat various kinds of foods, such as bamboo shoots, oak mast, and grasses, and the food items change according to season [29,43].

In this study, juveniles were defined based on a distinct stripe pattern by camera observation. This stripe pattern is lost at 4 months after birth, when the body weight exceeds 15 kg [44].

### Data collection

In total, 180 motion-activated camera traps (Strike Force HD Pro; Browning Trail Cameras, Morgan, UT) were placed in forests (broad-leaved, conifer plantation, or bamboo) in the study area. Although the wild boar also uses abandoned fields [29], cameras were not placed in these areas to avoid the infringement of privacy rights (i.e., to avoid obtaining images of people in the areas). Camera density was about 1 camera/4.4 km<sup>2</sup> (figure 2). Camera records were obtained from June 2018 to May 2019. Each camera was set on a tree trunk about 1 m above the ground. An infrared flash enabled the camera to capture images of animals passing in front of it, even at night. All cameras captured 20-s videos with a 1-s delay between consecutive images. About every 3 months, the SD card and battery were replaced in all cameras.

The environmental variable was land use data within a 500-m fixed-radius buffer around each camera. This buffer size was determined by referring to the home range size of wild boars reported in Japan [45]. Six types of landscape elements were extracted from a national survey carried out from 2000 to 2008 [38]: broad-leaf forest, conifer plantation forests, farmland, bamboo forest, abandoned area, and residential area. Using ArcGIS 10.6 (Esri Inc., New York, NY), the percentage of each landscape element within each buffer was calculated. All variables were standardized (mean = 0, SD = 1) prior to analysis. To eliminate multicollinearity, six environmental variables were summarized by principal component analysis (PCA). Principal component axes 1–4 were used as environmental variables that may influence wild boar ecology (see Results for PCA axes).

Harvest records were provided by the governments of Chiba Prefecture, Futtso City, and Minamiboso City. These data included numbers of active traps and the details of individual animals trapped (e.g., date, sex, body weight, type of trap). Numbers of traps were recorded at the level of “management unit” defined by the municipal government (figure 2), with management units ranging from 4 km<sup>2</sup> to 55 km<sup>2</sup>. Numbers of active traps during a month were used as trapping effort. Individuals weighing less than 15 kg with juvenile-specific stripe patterns were defined as juveniles; otherwise, individuals were classified as adults [44].



Two types of traps were used in the study area: box traps (Supplementary material figure S2: left side) and snare traps (Supplementary material figure S2: right side). Box traps contained bait such as rice bran to attract wild boars. Snare traps consisted of a wire and spring and were buried underground. When an individual stepped on a snare trap, the wire entangled a leg. In the study area, about 72% of all captured wild boars were trapped by box traps, 25% were trapped by snare traps, and the rest were hunted.

## Analysis

Seasonal changes in population density, habitat use, and trap catchability were estimated by a series of equations described later using a Bayesian framework (figure 1).

### (1) Local population density and habitat use

Using the REST model [25], wild boar density was estimated from camera-trap data. The REST model is an extension of the REM [23]. The REM assumes that the detection rate is a function of animal density, animal movement speed, and the detection area of a camera; movement speed needs to be estimated from an alternative data source, such as radiotelemetry. However, the REST model uses staying time in a predetermined area within view of a camera (hereafter, staying time), instead of movement speed. Staying time is inversely proportional to movement speed and is easily measured from camera recordings. To fix the camera detection area, an equilateral triangle with a side length of 1.9 m within the view of a camera in the field was set (Supplementary material figure S3). We assumed that all animals passing through the focal area could be detected, like Nakashima *et al.* [25]. Passages by wild boars were counted, and the staying time at each passage was measured following the protocol described by Nakashima *et al.* [25].

To estimate wild boar density by the REST model, the following data were extracted from camera records in each month: (1) number of passages through the focal area and (2) staying time within the focal area. Density was estimated by the following equation:

$$[\text{Density}]_{i,m} = \frac{[\text{Numbers of passage through focal area}]_{i,m}}{[\text{Area of focal area}]} \times \frac{[\text{Staying time estimates}]_m}{[\text{Active time}]_m}, \text{ eqn (1)}$$

where  $i$  indicates the camera ID ( $i = 1, 2, \dots, 180$ ) and  $m$  indicates the month ( $m = 1, 2, \dots, 12$ ). Because wild boar activity is assumed to change seasonally, the staying time within the focal area was measured for each month. About 50 videos were selected from several sites each month, and staying time was measured using a stopwatch in a laboratory. To estimate the average staying time for each month, staying time data were fit to four distributions (exponential, gamma, log-normal, and Weibull distributions), and the best-fit model was determined by the Wyckoff -Akaike information criterion (WAIC) [46]. The log-normal distribution fitted the data the best. The staying time of juveniles and adults were estimated separately. The density of juveniles was estimated only from June to October in 2018 and in May in 2019 because the counts were too small to estimate staying time in other months. The "active time" in equation (1) was calculated from the total recording period

multiplied by the “daily activity proportion of time.” The daily activity proportion of time was estimated as the daily change in the number of times wild boars were recorded by camera [47], or the proportion of active time in a 24-h period. The REST model assumes that all individuals are active at the peak of the activity rhythm [25]. Because the daily activity proportion may differ among months and ages, separate estimates were obtained for juveniles and adults each month (see supplementary material figure S4). The negative binomial distribution was fitted to the number of passages through the focal area, as in Nakashima *et al.* [25]. The details of the REST model and analysis are described in Nakashima *et al.* [25].

Seasonal habitat use was assessed by incorporating environmental variables (summarized as PCA axes) as covariates into the REST model, as expressed in equation (2). The coefficient  $\alpha$  associated with environmental variables was used as the index of habitat use in the home range, as  $\alpha$  indicates fine-scale spatio-temporal variation in wild boar densities. The following equation was used to assess habitat use:

$$[\text{Density}]_{i,m} = \exp(\alpha_{0,m} + \sum_{e=1}^4 \alpha_{e,m} \times [\text{PC}]_{e,i}), \text{ eqn (2)}$$

where  $i$  indicates the camera ID ( $s = 1, 2, \dots, 180$ ),  $m$  indicates the month ( $m = 1, 2, \dots, 12$ ), and  $e$  indicates the type of environmental variable. PC indicates the principal component scores summarizing environmental variables around each camera,  $\alpha_0$  represents for the intercept (average density across environments), and  $\alpha_1$  to  $\alpha_4$  represent how each landscape composition affects the local wild boar density (i.e., the habitat preference in each month).

## (2) Population density at the management-unit level

To estimate the wild boar density at the management-unit level, densities in 1 km<sup>2</sup> grid cells over the whole study area were estimated by equation (3), assuming that landscape variables determine density:

$$[\text{Density}]_{c,m} = \exp(\alpha_{0,m} + \sum_{e=1}^4 \alpha_{e,m} \times [\text{PC}]_{e,c}), \text{ eqn (3)}$$

where  $c$  indicates a 1 km<sup>2</sup> cell ( $c = 1, 2, \dots, 897$ ) and  $m$  indicates the month. Principal component scores for the 1 km<sup>2</sup> cells were calculated by the percentages of landscape elements at each cell, combined with PCA axes in equation (2). Second, the density at the management-unit level was estimated by calculating the weighted average of cell densities, with the weights based on forested area in each cell.

## (3) Catchability

Catchability was estimated by harvest records of wild boars and the estimated parameters in equations 1 and 2. We assumed that the number of captured individuals was proportional to trap effort and animal density, and the proportionality constant was defined as trap catchability, as in Osada *et al.* [22]. The following equation was used to estimate catchability:

$$[\text{Trapped number}]_{u,m,t} | [\text{Average of trapped number}]_{u,m,t} \sim \text{Poisson}([\text{Average of trapped number}]_{u,m,t})$$

$$[\text{Catchability}]_{u,m,t} = \frac{[\text{Average of trapped number}]_{u,m,t}}{[\text{The number of traps}]_{u,m} \times [\text{Density}]_{u,m}}, \text{ eqn (4)}$$

where  $u$  indicates the management unit defined by the municipal government ( $u = 1, 2, \dots, 33$ ),  $m$  indicates the month ( $m = 1, 2, \dots, 12$ ), and  $t$  indicates the type of trap ( $t = 1, 2$ ; 1 indicates box trap and 2 indicates snare trap). The number of trapped individuals and the number of traps were obtained from harvest records provided by municipal governments.

We constructed a hierarchical Bayesian model including eqns (1) to (4) to estimate parameters simultaneously. Prior distributions for  $\alpha$  were uniform  $(-3, 3)$ , and those for catchability parameters were uniform  $(0, 1)$ . Posterior samples and distributions were obtained by MCMC sampling. The number of MC iterations was 50000, the burn-in was 10000 iterations, and the thinning interval was 20. The number of chains was 3. The convergence of the MCMC samples for all estimates was checked using  $R_{\text{hat}} (<1.1$ ; [48]). This analysis was performed using JAGS [49] with R (ver. 3.5.0, [50]). The JAGS code and settings are provided in the Appendix.

## 4. Results

The PCA axes summarizing environmental variables at camera sites are shown in figure 3. PC1 was positively associated with forests and negatively associated with the other landscape elements. PC2 represented a gradient of broad-leaved forests vs. conifer plantation forests, with positive scores for plantations and negative scores for broad-leaf forests. PC3 was positively associated with abandoned fields. PC4 represented mainly bamboo forests. The proportions of environmental variation explained by the four axes were 36%, 23%, 17%, and 13%, respectively, for axes 1–4.

From June in 2018 to May in 2019, we observed 2191 passages of adults and 1306 passages of juveniles within the focal area, and these data were used for the REST model.

### (1) Population density

Seasonal patterns in population densities differed between adult and juvenile wild boars (figure 4). The density of adults increased gradually from July to November and decreased thereafter. The density of juveniles increased in May and gradually decreased until October. This contrasting pattern may reflect the birth season in May in Japan [41] and the subsequent high mortality of juveniles and recruitment of juveniles into the adult stage, which may increase the adult population.

### (2) Habitat preference

The habitat preference of wild boars was assessed from the coefficients associated with environmental variables (figure 5). The coefficient score for PC1 was mostly negative throughout the year, indicating a preference for landscapes with farmlands and bamboo forests. The coefficient for PC2 was also negative for

1 most of the year, with strongly negative values from October to November and from April to May, indicating  
2 a preference for broad-leaved forests over conifer plantation forests, particularly in the periods from October  
3 to November and from April to May. The coefficient score for PC3 was generally positive throughout the year,  
4 with relatively large values in June and from December to February, indicating a particularly strong  
5 preference for abandoned fields during these periods. The coefficient for PC4, representing mainly bamboo  
6 forests, was positive throughout the year, but the effect was weaker than those of other PC axes.  
7  
8  
9

### 10 (3) Catchability

11  
12  
13 Catchability by box traps was about 1.7 times higher and more variable than that by snare traps (figure 6). The  
14 catchability by both types of traps showed clear seasonal patterns. A common feature is the increase in  
15 catchability from December to January (figure 6). From August to November, the trends differed between box  
16 and snare traps. The catchability of box traps remained relatively low in this season, while that by snare traps  
17 increased over time.  
18  
19  
20  
21  
22

## 23 5. Discussion

24  
25  
26 Using a Bayesian framework, we achieved the simultaneous estimation of seasonal dynamics of population  
27 density, habitat preference, and trapping catchability of wild boars. These parameters are quite useful for  
28 wildlife management, including the efficient spatial and temporal allocation of trapping effort, assessment of  
29 the effectiveness of population control programs, and habitat management to reduce crop damage. The  
30 simultaneous estimation of these three parameters (i.e., population density, habitat preference, and trapping  
31 catchability) has a substantial advantage over separate estimates with respect to accuracy and precision. The  
32 statistical model that we developed uses two different data types with contrasting spatial resolution; camera  
33 trapping data are locally precise, while harvest records provided by municipal governments can cover a broad  
34 spatial scale. This improves the reliability of parameter estimates.  
35  
36  
37  
38  
39  
40  
41  
42

43 Our approach provided more reasonable estimates of density and seasonal fluctuations than those in previous  
44 reports. The maximum density estimated in our study was in agreement, albeit slightly lower than in a  
45 previous estimate for the same area of 26/km<sup>2</sup> after the population increase within a season and before  
46 harvesting [22]. Moreover, the difference in seasonal density patterns between adults and juveniles can  
47 generally be explained by differences in life history and harvesting patterns in the study area. Females give  
48 birth in May and June [41], juveniles grow and lose their stripes in about 4 months [44], and mortality by  
49 harvesting increases in the winter (see supplementary material figureS1). There are, however, two points that  
50 should be addressed. First, the rapid density decrease after November cannot be explained solely by harvest  
51 mortality. It can potentially be explained by the shift in habitat preferences from forests to abandoned fields,  
52 as demonstrated by the increase in the PC3 coefficients (figure 5). This seems plausible because abandoned  
53 fields are known habitats for wild boars in Japan [29]. Because cameras were set mainly in forests, density  
54 estimates in forests may have decreased in this season. Another point to note is that estimated juvenile  
55  
56  
57  
58  
59  
60

densities were lower than those of adults, which should be an underestimate. On average, most female wild boars in Japan give birth to a litter of about four piglets in average [41]. With the assumption of an even sex ratio, the density of juveniles should be about twice that of adults just after the breeding season. The underestimation could be explained by the behavior of juveniles. Soon after birth, juveniles are cared for by females around the resting sites [35], while females spend time on foraging activities because lactation increases energetic needs [51]. Due to frequent resting by juveniles, the assumption of the REST model that all individuals are active at the peak of the activity rhythm could be violated. This might lead to the underestimation of the daily activity and thereby juvenile densities.

The detected habitat preferences also seemed to accurately reflect the feeding and behavioral habits of wild boars. We found that wild boars prefer broad-leaf forests, abandoned fields, and bamboo forests to varying degrees. The preference for broad-leaf forests was rather high and became stronger in the autumn and in spring. Conifer plantations (*Cryptomeria japonica* and *Chamaecyparis obtusa*) are known to be less preferred by wild boars due to the lack of food resources [29,52], while broad-leaf forests are good feeding sites for the species [42,52]. In the study area, broad-leaf forests consisting mainly of Fagaceae trees produce a large number of acorns in the late autumn, which are highly digestible and nutritional for wild boars [53]. Moreover, soil invertebrates such as earthworms become abundant in broad-leaf forests from April to May [54]. Such food phenology may explain the seasonal dynamics observed in this study.

We found effects of various surrounding landscape elements on local densities in forests. In particular, farmlands, abandoned fields, and bamboo forests generally enhanced the local density of wild boars in forests. These landscape elements seemed to provide wild boars with seasonal resources. For instance, we detected a preference for bamboo forests from December to February. In Chiba prefecture, wild boars consume bamboo shoots in the winter [55]. In addition, we detected a strong preference for abandoned fields in June and December–February. Abandoned fields provide feeding and resting sites to wild boars in Japan [29,43], including aboveground plant materials from the spring to summer [56] and roots in the winter [43]. Furthermore, the hunting season from November 15 to February 15 is likely to promote the use of abandoned fields as refuges [57]. Because the understory vegetation in forests is highly browsed by sika deer in our study area [39], wild boars may use abandoned fields with dense shrubs as resting sites, rather than forests with sparse vegetation.

We also clearly detected seasonal trends in trap catchability, as reported in earlier studies [33]. One prominent feature was an increase in catchability in the winter, which was common to both box and snare traps. This can be attributed to the food shortage in the winter, when there are no crops on farmlands and the nutritional condition of wild boars is poor [56]. A food shortage leads to an extension of the home range to search for foods [58], which may enhance the capture probability. Increased attraction to trap bait due to food shortage may also explain the higher catchability in winter, but this applies only to box traps. Contrary to the common trend in the winter, the catchability trends from August to November were different between box and snare

traps. Catchability by box traps in July was rather high and decreased thereafter, which could be due to abundant food resources. In particular, acorns in broad-leaf forests are abundant in the autumn. Because acorn availability is negatively correlated with the consumption of other resources [59], wild boars are less likely to be attracted by baits in this season. Catchability by snare traps showed a different pattern; it increased slightly from June to November. The reason for this trend is not clear, and further work is needed to determine whether it is significant and meaningful.

### **Management implications**

We developed a novel statistical framework using camera trapping and harvest records to uncover seasonal changes in the population density, habitat preference, and trapping catchability of wild boars in Japan. Most of the observed changes could be explained by the dynamics of food availability in landscapes, the reproductive cycle, and harvesting by humans. These results can help hunters and local policymakers determine effective seasons and landscape types for trap placement.

Our results provide a basis for specific recommendations for the management of wild boar populations. Trapping effort should be increased in the winter when catchability is high. In this season, wild boars showed relatively high utilization of abandoned fields; accordingly, setting box traps around abandoned fields, with daily inspection, should be prioritized. In other seasons, trapping locations can be determined based on wild boar habitat selection. For instance, from September to October, the main habitat shifts from abandoned fields to broad-leaf forests, and the opposite directional shift is found from November to December. The seasonal patterns of habitat use and catchability may be regional and hence are not generalizable. However, such information can be obtained by the application of our model in cases where camera trapping data and harvest records by municipal governments are available.

One of the advantages of camera-trapping observations is that all animals passing in front of cameras are detectable. We focused on the wild boar, but the methodology can be readily applied to sympatric species. Moreover, camera-trapping data spanning several years make it possible to estimate demographic parameters (such as survival rates) and long-term population dynamics. These technical advances will make a substantial contribution to the management of wildlife that are difficult to detect by traditional methods.

### **Acknowledgments**

We thank the public officers of the municipal governments in our study area. We are also grateful to H. Yokomizo, G. Takimoto and G. Fujita for helpful comments. Data collection was supported by students of Nihon University College of Bioresource Science. We appreciate their huge efforts.

## References

1. Côté S.D., Rooney T.P., Tremblay J.P., Dussault C., & Waller D.M.. 2004. Ecological impacts of deer overabundance. *Annu. Rev. Ecol. Evol. Syst.* **35**, 113-147. (doi: [10.1146/annurev.ecolsys.35.021103.105725](https://doi.org/10.1146/annurev.ecolsys.35.021103.105725))
2. Takatsuki S.. 2009. Effects of sika deer on vegetation in Japan: a review. *Biol Conserv.* **142(9)**. 1922-1929. (doi: [10.1016/j.biocon.2009.02.011](https://doi.org/10.1016/j.biocon.2009.02.011))
3. Ward A.I.. 2005. Expanding ranges of wild and feral deer in Great Britain. *Mammal Rev.* **35(2)**. 165-173. (doi: [10.1111/j.1365-2907.2005.00060.x](https://doi.org/10.1111/j.1365-2907.2005.00060.x))
4. Ward A.I., & Smith G.C.. 2012. Predicting the status of wild deer as hosts of *Mycobacterium bovis* infection in Britain. *Eur J Wildlife Res.* **58(1)**. 127-135. (doi: [10.1007/s10344-011-0553-7](https://doi.org/10.1007/s10344-011-0553-7))
5. Apollonio, M., Belkin, V. V., Borkowski, J., Borodin, O. I., Borowik, T., Cagnacci, F., Danilkin, A. A., Danilov, P. I., Faybich, A., Ferretti, F., Gaillard, J. M., Hayward, M., Heshtaut, P., Heurich, M., Hurynovich, A., Kashtalyan, A., Kerley, G. I. H., Kjellander, P., Kowalczyk, R., Kozorez, A., Matveytchuk, S., Milner, J. M., Mysterud, A., Ozoliņš, J., Panchenko, D.V., Peters, W., Podgórski, W. P. T., Pokorny, B., Rolandsen, C. M., Ruusila, V., Schmidt, K., Sipko, T. P., Veeroja, R., Velihurau, P., & Yanuta, G.. 2017. Challenges and science-based implications for modern management and conservation of European ungulate populations. *Mammal Res.* **62(3)**. 209-217. (doi: [10.1007/s13364-017-0321-5](https://doi.org/10.1007/s13364-017-0321-5))
6. Beasley, J. C., Ditchkoff, S. S., Mayer, J. J., Smith, M. D., & Vercauteren, K. C.. 2018. Research priorities for managing invasive wild pigs in North America. *J Wildlife Manage.* **82(4)**. 674-681. (doi: [10.1201/b22014-20](https://doi.org/10.1201/b22014-20))
7. Grarock, K., Tidemann, C. R., Wood, J. T., & Lindenmayer, D. B.. 2014. Understanding basic species population dynamics for effective control: a case study on community-led culling of the common myna (*Acridotheres tristis*). *Biol Invasions.* **16(7)**. 1427-1440. (doi: [10.1007/s10530-013-0580-2](https://doi.org/10.1007/s10530-013-0580-2))
8. Hulme, P. E.. 2006. Beyond control: wider implications for the management of biological invasions. *J Appl Ecol.* **43(5)**. 835-847. (doi: [doi.org/10.1111/j.1365-2664.2006.01227.x](https://doi.org/10.1111/j.1365-2664.2006.01227.x))
9. Barrios-García, M. N., & Ballari, S. A.. 2012. Impact of wild boar (*Sus scrofa*) in its introduced and native range: a review. *Biol Invasions.* **14(11)**, 2283-2300. (doi: [10.1007/s10530-012-0229-6](https://doi.org/10.1007/s10530-012-0229-6))
10. Massei, G., & Genov, P. V.. 2004. The environmental impact of wild boar. *Galemys.* **16(1)**. 135-145. (doi: )
11. Ballari, S. A., & Barrios-García, M. N.. 2014. A review of wild boar *Sus scrofa* diet and factors affecting food selection in native and introduced ranges. *Mammal Rev.* **44(2)**. (doi: [10.1111/mam.12015](https://doi.org/10.1111/mam.12015))
12. Herrero, J., García-Serrano, A., Couto, S., Ortuño, V. M., & García-González, R.. 2006. Diet of wild boar *Sus scrofa* L. and crop damage in an intensive agroecosystem. *Eur J Wildlife Res.* **52(4)**. 245-250. (doi: [10.1007/s10344-006-0045-3](https://doi.org/10.1007/s10344-006-0045-3))
13. Pimentel, D., Zuniga, R., & Morrison, D.. 2005. Update on the environmental and economic costs associated with alien-invasive species in the United States. *Ecol Econ.* **52(3)**. 273-288. (doi: [10.1016/j.ecolecon.2004.10.002](https://doi.org/10.1016/j.ecolecon.2004.10.002))
14. Barasona, J. A., Latham, M. C., Acevedo, P., Armenteros, J. A., Latham, A. D. M., Gortazar, C., Carro, F., Soriguer, R. C., & Vicente, J.. 2014. Spatiotemporal interactions between wild boar and cattle: implications for cross-species disease transmission. *Vet Res.* **45(1)**. 122. (doi: [10.1186/s13567-014-0122-7](https://doi.org/10.1186/s13567-014-0122-7))
15. Naranjo, V., Gortazar, C., Vicente, J., & de la Fuente, J.. 2008. Evidence of the role of European wild boar as a reservoir of *Mycobacterium tuberculosis* complex. *Vet Microbiol.* **127(1-2)**. 1-9. (doi: [doi.org/10.1016/j.vetmic.2007.10.002](https://doi.org/10.1016/j.vetmic.2007.10.002))
16. Massei, G., Coats, J., Lambert, M. S., Pietravalle, S., Gill, R., & Cowan, D.. 2018. Camera traps and activity signs to estimate wild boar density and derive abundance indices. *Pest Manag Sci.* **74(4)**. 853-860. (doi: [doi.org/10.1002/ps.4763](https://doi.org/10.1002/ps.4763))
17. Keuling, O., Sange, M., Acevedo, P., Podgórski, T., Smith, G., Scandura, M., Apollonio, M., Ferroglio, E., & Vicente, J.. 2018. Guidance on estimation of wild boar population abundance and density: methods, challenges, possibilities. *EFSA Support Publ.* **15(6)**. (doi: [10.2903/sp.efsa.2018.EN-1449](https://doi.org/10.2903/sp.efsa.2018.EN-1449))
18. Ohashi, H., Saito, M., Horie, R., Tsunoda, H., Noba, H., Ishii, H., Kuwabara, T., Hiroshige, Y., Koike, S., Hoshino, Y., Toda, H., & Kajii, K.. 2013. Differences in the activity pattern of the wild boar *Sus scrofa* related to human disturbance. *Eur J Wildlife Res.* **59(2)**. 167-177. (doi: [10.1007/s10344-012-0661-z](https://doi.org/10.1007/s10344-012-0661-z))
19. Sweitzer, R. A., Van Vuren, D., Gardner, I. A., Boyce, W. M., & Waithman, J. D.. 2000. Estimating sizes of wild pig populations in the north and central coast regions of California. *J Wildlife Manage.* 531-543. (doi: [10.2307/3803251](https://doi.org/10.2307/3803251))
20. Acevedo, P., Vicente, J., Höfle, U., Cassinello, J., RUIZ-FONS, F., & Gortázar, C.. 2007. Estimation of European wild boar relative abundance and aggregation: a novel method in epidemiological risk assessment. *Epidemiol Infect.* **135(3)**. 519-527. (doi: [10.1017/S0950268806007059](https://doi.org/10.1017/S0950268806007059))
21. Davis, A.J., Hooten, M.B., Miller, R.S., Farnsworth, M.L., Lewis, J., Moxcey, M. and Pepin, K.M.. 2016. Inferring invasive species abundance using removal data from management actions. *Ecol Appl.* **26**. 2339-2346. (doi: [10.1002/eap.1383](https://doi.org/10.1002/eap.1383))
22. Osada, Y., Kuriyama, T., Asada, M., Yokomizo, H., & Miyashita, T.. 2015. Exploring the drivers of wildlife population dynamics from insufficient data by Bayesian model averaging. *Popul Ecol.* **57(3)**. 485-493. (doi: [10.1007/s10144-015-0498-x](https://doi.org/10.1007/s10144-015-0498-x))
23. Rowcliffe, J. M., Field, J., Turvey, S. T., & Carbone, C. 2008. Estimating animal density using camera traps without the need for individual recognition. *J Appl Ecol.* **45(4)**. 1228-1236. (doi: [10.1111/j.1365-2664.2008.01473.x](https://doi.org/10.1111/j.1365-2664.2008.01473.x))
24. Hutchinson, J. M., & Waser, P. M.. 2007. Use, misuse and extensions of "ideal gas" models of animal encounter. *Biol Rev.* **82(3)**.

- 335-359. (doi: [doi.org/10.1111/j.1469-185X.2007.00014.x](https://doi.org/10.1111/j.1469-185X.2007.00014.x))
25. Nakashima, Y., Fukasawa, K., & Samejima, H.. 2018. Estimating animal density without individual recognition using information derivable exclusively from camera traps. *J Appl Ecol.* **55**(2). 735-744. (doi: [10.1111/1365-2664.13059](https://doi.org/10.1111/1365-2664.13059))
  26. Nakashima, Y., Hongo, S., & Akomo-Okoue, E. F.. 2020. Landscape-scale estimation of forest ungulate density and biomass using camera traps: Applying the REST model. *Biol Conserv.* **241**. 108381. (doi: [10.1016/j.biocon.2019.108381](https://doi.org/10.1016/j.biocon.2019.108381))
  27. Kuwabara T., Ohashi H., Saito M., Hiroshige Y., Koike S., Toda H., & Kaji K.. 2010. Conditions and course of solution on rural agricultural damages caused by wild boar. *J Rural Econ Special Issue.* **2010**. 305 – 312 (in Japanese)
  28. Ministry of Agriculture, Forestry and Fisheries in Japan. 2019. Annual reports on the reality and countermeasure of wildlife damage. URL <https://www.maff.go.jp/j/seisan/tyozyu/higai/attach/pdf/index-326.pdf> (in Japanese)
  29. Kodera Y., Kanzaki N., Kaneko Y., & Tokida K. 2001.. Habitat selection of Japanese wild boar in Iwami district, Shimane prefecture, western Japan. *Wildl Conserv Jpn.* **6**. 119–129. (doi: [10.20798/wildlifeconsjp.6.2\\_119](https://doi.org/10.20798/wildlifeconsjp.6.2_119)) (in Japanese)
  30. Saito, M., Momose, H., & Mihira, T.. 2011. Both environmental factors and countermeasures affect wild boar damage to rice paddies in Boso Peninsula, Japan. *Crop Prot.* **30**(8). 1048-1054. (doi: [10.1016/j.cropro.2011.02.017](https://doi.org/10.1016/j.cropro.2011.02.017))
  31. Eguchi, Y.. 2008. Crop damage management: management of damage by wild boar. In: Takatsuki, S., Yamagiwa, J. (Eds.), Middle- and Large-Sized Mammals Including Primates (Mammalogy in Japan 2). University of Tokyo Press, Tokyo. pp. 401-426 (in Japanese).
  32. Ueda, G., Kanzaki, N., & Koganezawa, M. (2010). Changes in the structure of the Japanese hunter population from 1965 to 2005. *Human Dimensions of wildlife.* **15**(1). 16-26. (doi: [10.1080/10871200903161470](https://doi.org/10.1080/10871200903161470))
  33. Caley, P.. 1994. Factors affecting the success rate of traps for catching feral pigs in a tropical habitat. *Wildlife Res.* **21**(3). 287-291. (doi: [10.1071/WR9940287](https://doi.org/10.1071/WR9940287))
  34. Wyckoff, A. C., Henke, S. E., Campbell, T., & VerCauteren, K. C.. 2006. Is trapping success of feral hogs dependent upon weather conditions?. In Proceedings of the Vertebrate Pest Conference (Vol. 22, No. 22). (doi: [10.5070/V422110217](https://doi.org/10.5070/V422110217))
  35. Morelle, K., Podgórski, T., Prévot, C., Keuling, O., Lehaire, F., & Lejeune, P. 2015. Towards understanding wild boar *Sus scrofa* movement: a synthetic movement ecology approach. *Mammal Rev.* **45**(1). 15-29. (doi: [10.1111/mam.12028](https://doi.org/10.1111/mam.12028))
  36. Rastetter, E. B., King, A. W., Cosby, B. J., Hornberger, G. M., O'Neill, R. V., & Hobbie, J. E.. 1992. Aggregating fine - scale ecological knowledge to model coarser - scale attributes of ecosystems. *Ecol Appl.* **2**(1). 55-70. (doi: [10.2307/1941889](https://doi.org/10.2307/1941889))
  37. Asada, M.. 2011 Distribution and pest control, damage to agricultural reduction for wild boar in 2009 in Chiba prefecture, Japan. *Rep Chiba Biodivers Cent.* **3**. 49–64 (in Japanese)
  38. Ministry of the Environment in Japan. 2009. The 6th and 7th national survey on the natural environment. URL [http://www.biodic.go.jp/kiso/fnd\\_f.html](http://www.biodic.go.jp/kiso/fnd_f.html) (in Japanese)
  39. Suzuki, M., Miyashita, T., Kabaya, H., Ochiai, K., Asada, M., & Tange, T.. 2008. Deer density affects ground - layer vegetation differently in conifer plantations and hardwood forests on the Boso Peninsula, Japan. *Ecol Res.* **23**(1). 151-158. (doi: [10.1007/s11284-007-0348-1](https://doi.org/10.1007/s11284-007-0348-1))
  40. Chiba Prefectural Government (2018). Response to wildlife damage: Yearly report of crop damage. URL [https://www.pref.chiba.lg.jp/noushin/choujuu/yuugai/documents/h30higaijyoukyou23\\_4.pdf](https://www.pref.chiba.lg.jp/noushin/choujuu/yuugai/documents/h30higaijyoukyou23_4.pdf) (in Japanese)
  41. Tsuji, T., Yokoyama, M., Asano, M., & Suzuki, M.. 2013. Estimation of the fertility rates of Japanese wild boars (*Sus scrofa leucomystax*) using fetuses and corpora albicans. *Acta Theriol.* **58**(3). 315-323. (doi: [10.1007/s13364-012-0115-8](https://doi.org/10.1007/s13364-012-0115-8))
  42. Thurfjell, H., Ball, J. P., Åhlén, P. A., Kornacher, P., Dettki, H., & Sjöberg, K.. 2009. Habitat use and spatial patterns of wild boar *Sus scrofa* (L.): agricultural fields and edges. *Eur J Wildlife Res.* **55**(5). 517-523. (doi: [10.1007/s10344-009-0268-1](https://doi.org/10.1007/s10344-009-0268-1))
  43. Tsunoda, Y., Ohashi, H., Saito, M., Horie, R., Noba., H, Koike, S., Hoshino, Y., Toda, H., & Kaji, K.. 2014. Foraging condition of wild boars in Shingo district and Himuro district, Sano city, Tochigi prefecture, Japan. *Wildlife and Human Society.* **1**(2). 61-70. (doi: [10.20798/awhswhs.1.2\\_61](https://doi.org/10.20798/awhswhs.1.2_61)) (in Japanese)
  44. Dardaillon, M.. 1988. Wild boar social groupings and their seasonal changes in the Camargue, southern France. *Zeitschrift für Säugetierkunde,* **53**(1). 22-30.
  45. Kodera Y, Nagatsuma T, Sawada S, Fujihara S., & Kanamori H. 2010. How does spreading maize on fields influence behavior of wild boars (*Sus scrofa*)? *Mamm Sci.* **50**. 137 – 144. (doi: [10.11238/mammalianscience.50.137](https://doi.org/10.11238/mammalianscience.50.137)) (in Japanese with English abstract)
  46. Watanabe, S.. 2013. A widely applicable Bayesian information criterion. *J Mach Learn Res,* **14**(Mar). 867-897.
  47. Rowcliffe, J. M., Kays, R., Kranstauber, B., Carbone, C., & Jansen, P. A.. 2014. Quantifying levels of animal activity using camera trap data. *Methods Ecol Evol.* **5**(11). 1170-1179. (doi: [doi.org/10.1111/2041-210X.12278](https://doi.org/10.1111/2041-210X.12278))
  48. Gelman, A., Carlin, J. B., Stern, H. S., Dunson, D. B., Vehtari, A., & Rubin, D. B.. 2013. Bayesian data analysis. 3rd edn. Chapman and Hall/CRC. (doi: [10.1201/b16018](https://doi.org/10.1201/b16018))
  49. Plummer, M.. 2003. JAGS: A program for analysis of Bayesian graphical models using Gibbs sampling. In Proceedings of the 3rd international workshop on distributed statistical computing (Vol. 124, No. 125, p. 10). URL <https://www.r-project.org/conferences/DSC-2003/Proceedings/Plummer.pdf>
  50. R Core Team (2018). R: A language and environment for statistical computing. R Foundation for Statistical Computing, Vienna, Austria. URL <https://www.R-project.org/>
  51. Russo, L., Massei, G., & Genov, P. V.. 1997. Daily home range and activity of wild boar in a Mediterranean area free from hunting. *Ethol Ecol Evol,* **9**(3). 287-294. (doi: [10.1080/08927014.1997.9522888](https://doi.org/10.1080/08927014.1997.9522888))
  52. Fonseca, C.. 2008. Winter habitat selection by wild boar *Sus scrofa* in southeastern Poland. *Eur J Wildlife Res.* **54**(2). 361. (doi: [10.1007/s10344-007-0144-9](https://doi.org/10.1007/s10344-007-0144-9))



53. Herrero, J., Irizar, I., Laskurain, N. A., García - Serrano, A., & García - González, R.. 2005. Fruits and roots: wild boar foods during the cold season in the southwestern Pyrenees. *Ital J Zool*, **72(1)**, 49-52. (doi: [10.1080/11250000509356652](https://doi.org/10.1080/11250000509356652))
54. Kato, H., & Fukuyama, K.. 2015. Seasonal change of larger soil fauna in aging cedar forests in Boso Peninsula, Chiba prefecture. *Edaphologia*. **96**. 13-18. (doi: [10.20695/edaphologia.96.0\\_13](https://doi.org/10.20695/edaphologia.96.0_13)) (in Japanese)
55. Chiba Forestry Research Institute (2018). A need to take steps on bamboo forests to decrease crop damage caused by wild boars. URL [https://www.pref.chiba.lg.jp/lab-nourin/seikanokouhyou/h29/documents/18-2\\_3.pdf](https://www.pref.chiba.lg.jp/lab-nourin/seikanokouhyou/h29/documents/18-2_3.pdf) (in Japanese)
56. Kodera Y., & Kanzaki N.. 2001. Seasonal change of diet and nutritional level of wild boar in Iwami district, Shimane prefecture, western Japan. *Wildl Conserv Jpn*. **6**. 109–117. (doi: [10.20798/wildlifeconsjp.6.2\\_109](https://doi.org/10.20798/wildlifeconsjp.6.2_109)) (in Japanese)
57. Thurfjell, H., Spong, G., & Ericsson, G..2013. Effects of hunting on wild boar *Sus scrofa* behaviour. *Wildlife Biol*. **19(1)**. 87-94. (doi: [10.2981/12-027](https://doi.org/10.2981/12-027))
58. Massei, G., Genov, P. V., & Staines, B. W.. 1996. Diet, food availability and reproduction of wild boar in a Mediterranean coastal area. *Acta Theriol*. **41**. 307-320. (doi: [10.4098/AT.arch.96-29](https://doi.org/10.4098/AT.arch.96-29))
59. Schley, L., & Roper, T. J.. 2003. Diet of wild boar *Sus scrofa* in Western Europe, with particular reference to consumption of agricultural crops. *Mammal rev*, **33(1)**, 43-56. (doi: [10.1046/j.1365-2907.2003.00010.x](https://doi.org/10.1046/j.1365-2907.2003.00010.x))

### Ethical Statement

Harvesting records used in this study were provided by local governments in Chiba prefecture, and the harvesting was conducted by the local governments under Wildlife Protection and Hunting Management Law in Japan.

### Funding Statement

This study was financially supported by the Grant-in-Aid for JSPS Fellows (KAKENHI Number 17H01916) and the Environmental Technology Development Fund, Ministry for the Environment, Japan (SUSHINHI Number 4-1704).

### Data Accessibility

The datasets supporting this article is available in the electronic supplementary material.

### Competing Interests

We have no competing interest.

### Authors' Contributions

YY carried out data analysis, drafted the manuscript; YN participated in the design of the study, collected field data, and helped data analysis; GY collected field data and analysed video recordings; TM participated in the design of the study and critically revised the manuscript. All authors gave final approval for publication and agree to be held accountable for the work performed therein.

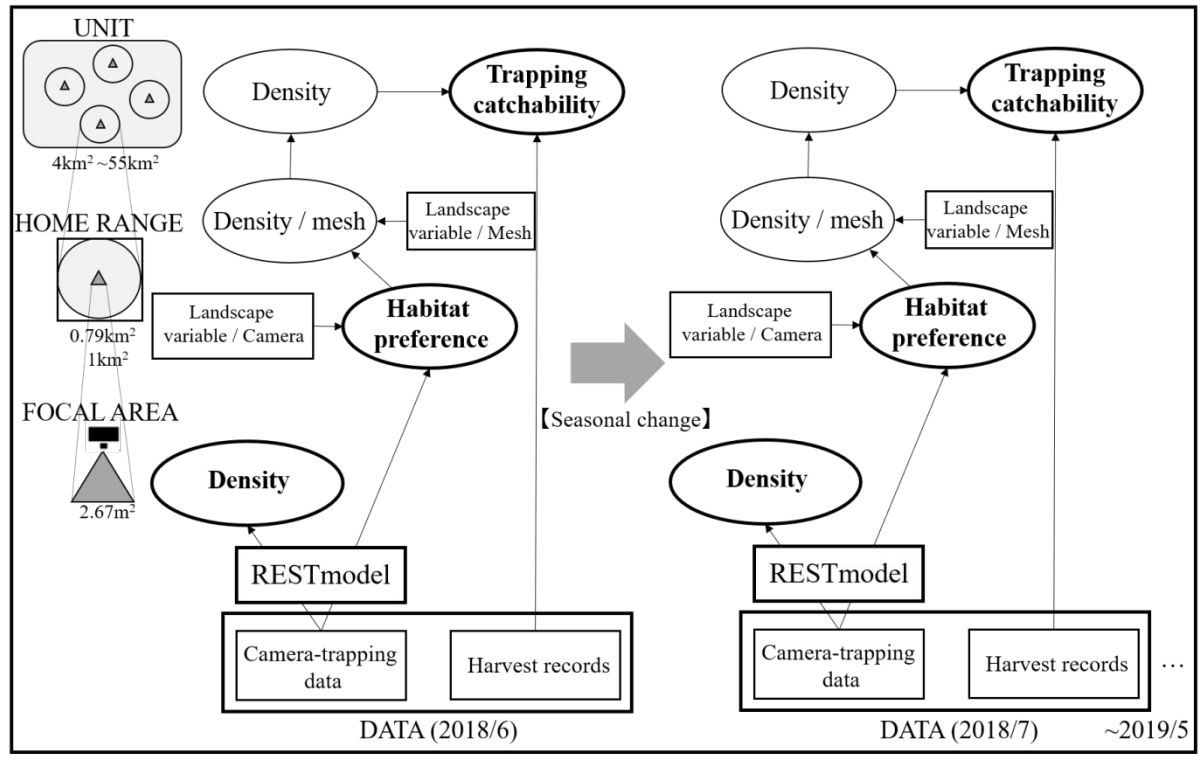

Figure 1

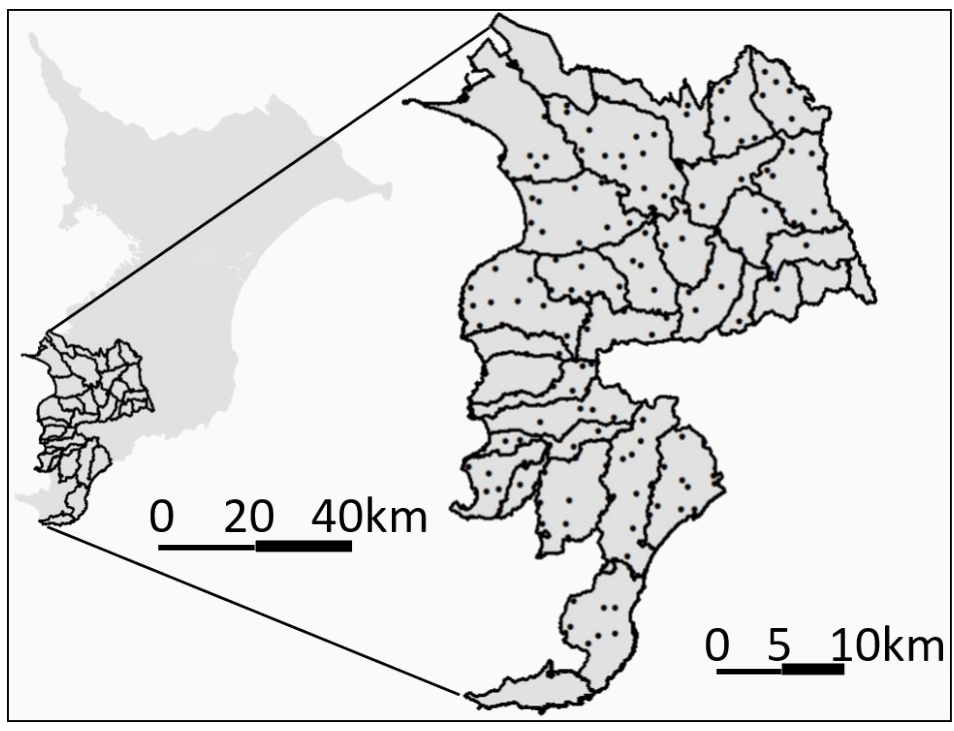

Figure 2

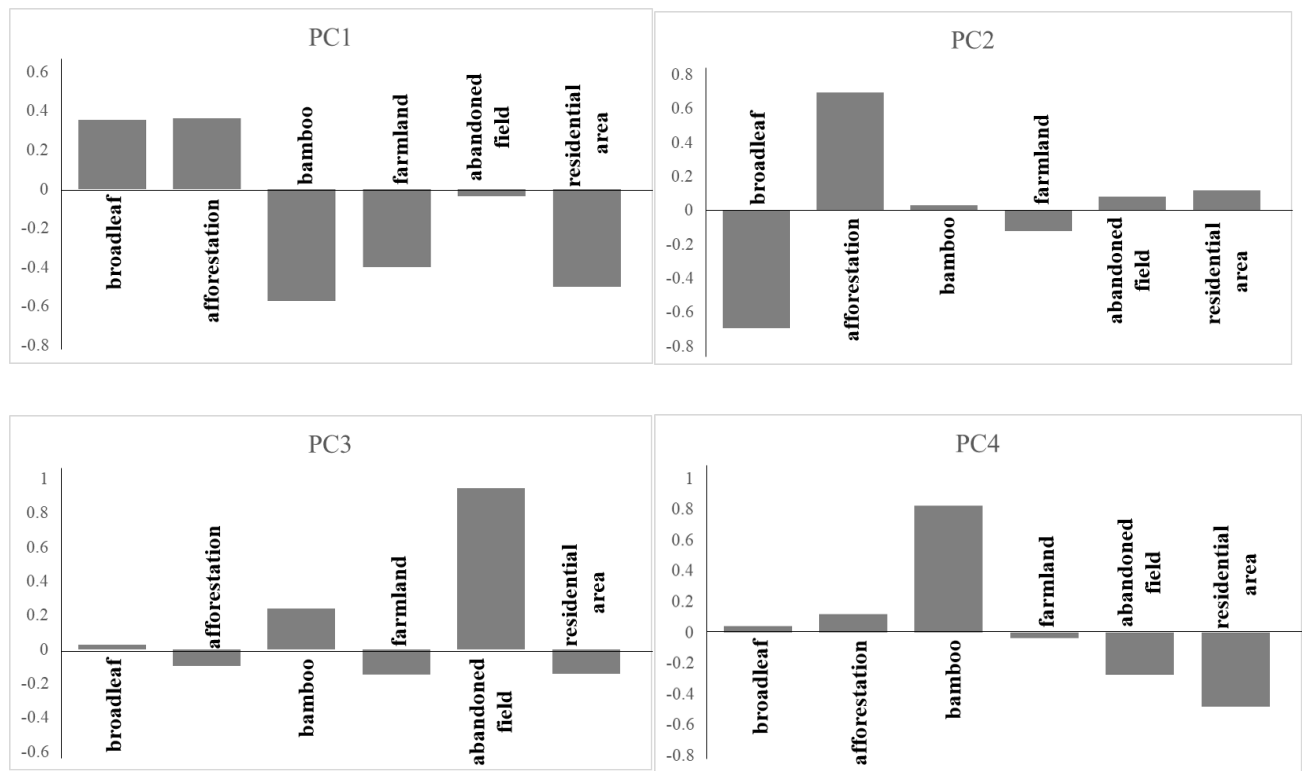

Figure 3

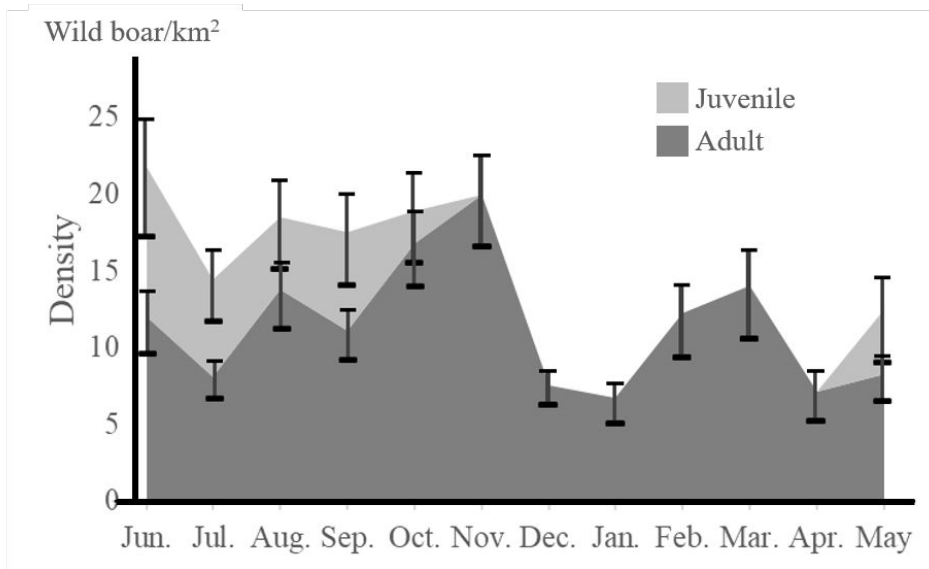

Figure 4

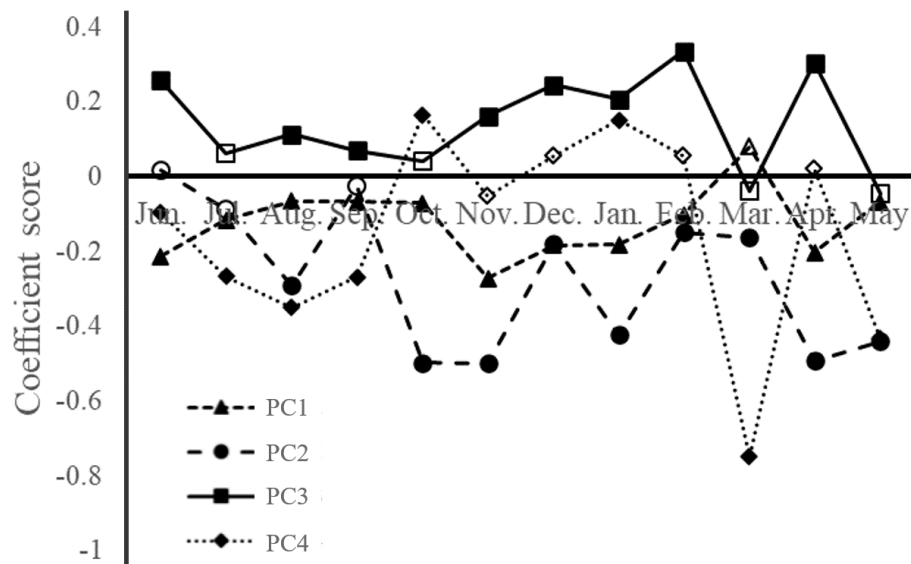

Figure 5

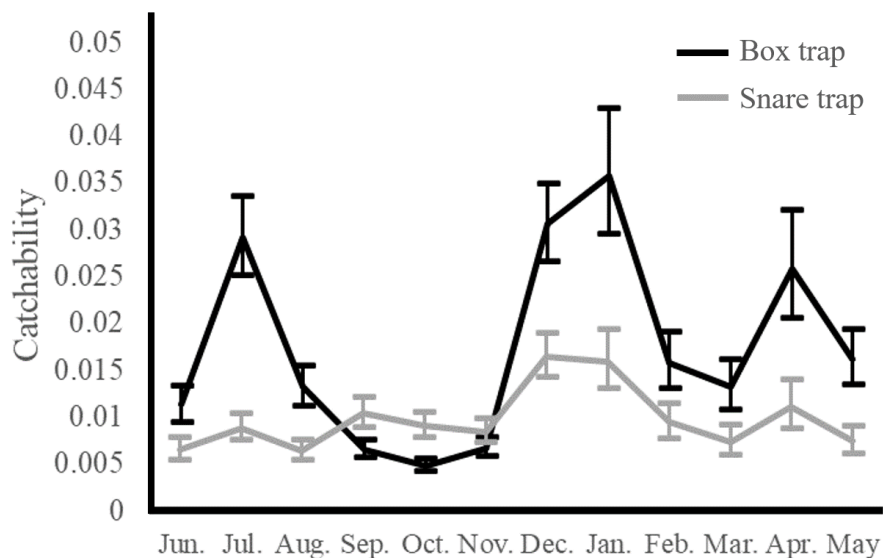

Figure 6

#### Figure captions

Figure 1 General framework of our statistical model.

Parameters we estimated from the equations of our model are shown in bold font. We assessed the seasonal change of these parameters through a year.

Figure 2 The study area consisting of 33 management units of wild boars (areas enclosed with lines) and the locations where camera traps were placed (dots).

Figure 3 Factor loadings of each landscape element that constitute Principal Component axes.

---

1  
2 Figure 4 Seasonal changes in the estimated densities of juveniles (gray line) and adults (black line) . Whiskers  
3 represent the 50% credible interval.  
4  
5

6 Figure 5 Estimated values of coefficients associated with the environmental variables. Filled symbols indicate  
7  
8 coefficients whose 95 % credible intervals do not overlap 0.  
9

10 Figure 6 Seasonal change in estimated catchability of two types of traps (box and snare traps) in each month.  
11  
12 Whiskers represent the 50% credible interval.  
13  
14  
15  
16  
17  
18  
19  
20  
21  
22  
23  
24  
25  
26  
27  
28  
29  
30  
31  
32  
33  
34  
35  
36  
37  
38  
39  
40  
41  
42  
43  
44  
45  
46  
47  
48  
49  
50  
51  
52  
53  
54  
55  
56  
57  
58  
59  
60

## Appendix B

### Responses to Reviewer: 1

Thank you for valuable comments. Most of them are very useful for improving our manuscript, and we have revised it accordingly. **The revised parts are indicated by red letters in the revised manuscript.** Below you can see the responses to each of your comments.

1. I think that this manuscript is written as a standard research paper right now but has the potential to be written up as a more methodological paper. At the moment the authors mention that they introduce a novel statistical framework, but as reader you do not get the feeling that this is the main focus. I would advise restructuring the manuscript and put the main focus on the method development and using the wild boar population as a case study. Annotations in the attached r-script can help to make it reproducible for researchers dealing with similar topics/challenges. That will also involve that the advantages (“simultaneous estimation”) of this novel statistical framework get more attention. The authors mention it, but in my opinion it misses some depth and details. It seems that the simultaneous estimation is one major advantage, but it gets a bit lost in the biological interpretation of the case study (wild boar population). I think that by restructuring it to a “methodological paper”, the authors can reach a much broader audience of researchers dealing with harvest species in general.

→ We had an intention that this is a methodology-oriented paper, rather than focusing on wild boars. Nonetheless, as you pointed out, readers may feel this paper to be case study oriented. We have rewritten the Introduction so that more general issues are addressed. In particular, the order of paragraphs has been changed (L23-36). The two responses (revisions) to your comments below may also raise the impression that this paper is methodology oriented, rather than species specific.

2. This leads me directly to the next feedback point. At the moment the authors show that this “novel statistical framework” can be used for harvest species. But couldn't they expand/generalize it for species that need to be protected? The authors could also reach conservationists by showing how this method could be used for an endangered species for instance. Proper and reliable density estimation are also of huge importance for endangered species.

→ We agree with you, and thank you for helpful advice. Our method can be applied to various situations, including endangered species conservation and invasive alien management. For instance, wildlife populations in tropics are often hunted by local people to get bushmeat, and hunting records are available. Combined with a high resolution camera data, it is possible to know precise estimation of population densities, which is useful for making balance between conservation and utilization. Of course our models can be used for eradication programs of invasive aliens. These statements have been added to the Abstract (L13-14), Introduction (L68-70), and Discussion (L313–323).

3. I am a bit concerned to what extent this model can be used by managers/researcher that do not have harvest records/trapping data, but only rely on camera trap data for instance. It seems that in Japan trapping records are important measure to control the population of wild boar, however, in Europe, as I know, hunting plays most important role and trapping is not allowed to control the population. That makes it difficult to

translate this approach to a European situation. I would advise that the authors elaborate this issue (challenges and limitations for generalization of the statistical framework) in a separate section of the manuscript. In addition, adding information about a more general use will make it much more interesting to a broader public. I also miss this aspect in the last section of the manuscript about management implications. Can this model be used if no trapping data are available? How would I need to deal with it?

→ Our model used trapping data indeed, but the essence of our model is to integrate “catch-effort model” and REST model (using camera data), so it can be readily used for any types of hunting data, including ground and aerial shooting, if effort data are available. This means that our model is quite general for wildlife management. This sort of statement has been added to the Discussion, along with the model’s utility for alien species management and endangered species conservation mentioned above (L313–323).

4. One confusing thing for the reader is that the authors switch between the terms “harvest record” and “trapping records”. They need to be consistent with it to not confuse the reader. In addition, it would be good to explain “harvest record” already shortly in the introduction, since it also appears in figure 1 (in the introduction). To me the difference between hunting bag and harvest record was not clear in the beginning. Defining harvest record will help the reader a lot.

→ As you suggested, we have made the usage of terms being consistent. The harvest record we used in this study is only trapping data, as the number of shot individuals accounted for only 3% of the total number of hunted. Such a definition has been described in M & M.

5. I am a bit concerned about the fact that the authors did not include more age classes. They used only juveniles (<4 months) and adults (>4 months). As mentioned in my specific comments below, I would add yearlings because we cannot be certain that adults and yearlings do not differ in their habitat use, activity pattern and catchability.

→ From camera observation, yearlings without stripe patterns are indistinguishable from adults, so only the two age groups (juvenile and adult) were used in this study. This statement has been added (L95-97).

6. I would also recommend to the authors to make clearer in the result section that the analysis were conducted on different spatial scales. At the moment it seems that some interpretations from the results are not correct, however, after reading carefully the methods again it becomes clear. As an example. In the summary, the authors mention the habitat preference of forests adjacent to abandoned fields. From the result section, this conclusion does not become really clear, still I am certain that the analysis were done on this.

→ As you already noticed, habitat preference of wild boars was estimated from surrounding landscape structures that are spatially broader than the local camera sites. We have rephrased to make the meaning clearer, “landscape variables surrounding camera sites set in forests” (L205), and “landscape variables around camera traps”(L219) in the results section. The corresponding part of the abstract has also been changed; “forests having abandoned fields nearby were generally preferred”(L9).

7. A bit a minor remark, but since it is a general remark and not mentioned in specific minor comments: In general I would rather refer to “landscape variables” than “environmental variables”, since environmental can be much broader and are less specific. Landscape gives the reader a more concrete idea of what is meant.

→ Done.

Minor comments:

Page 2:

L40: instead of “;” – sign, I would advise a point as end of the sentence.

Done

L44: evaluated “as an example population”. I would add this to make it clearer for the reader.

Done

L45: mainly due to harvesting

Done

L45-L46: I do not see where this conclusion/result come from in your result section. In your results, you do not say that forests adjacent to abandoned fields are preferred and I don't think that you analysed this. If you did so, please make it clear to the reader.

→As with the above response to the major comment 6, we have rephrased to become the meaning clearer.

L47: so throughout the season? I would add this in the sentence to make it clearer to the reader.

Done

L50: for me it sounds that attractiveness of trap bait and activity changes in response to food scarcity is similar or at least closely related. I would rather write: ....., which probably reflected changes in the attractiveness of the trap bait due to activity changes in response to food scarcity.

Done.

Page 3:

L3: I advise putting keywords in alphabetical order.

Done.

L9: I would recommend mentioning some example mammal populations in brackets.

Done.

L16: I think I understand what you mean by field signs but maybe short elaboration is better. Give an example for instance. I am not sure if field sign is the most appropriate word here.

→ Footprints and feces have been described as examples.



L27: what is the difference between hunting bag and harvest record? I would have expected that it is the same. Thus, I would advise explaining the definition of harvest record already in an early stage since it is also used in the title.

→ We have made the usage of terms being consistent, and clarified the definition.

L41: can you elaborate a bit more which parameters for instance are estimated by the camera trap data so that it is better to understand for a reader without the background knowledge of the REST model?

→ Population density has been added as an example.

L51: You can even put it in a broader context. Not only in Japan but worldwide wild boar are causing damage. You could start with the fact that worldwide wild boar are causing damage with some countries as example and then narrow down to also in Japan they are causing damage and continue your story. That makes it maybe even more interesting for a broader public.

Done.

L52: “As abandonment of agricultural fields increases due to human population aging, sites preferred by wild boar, including abandoned fields and bamboo forests, have been increasing, thereby leading to crop damage near residential areas. This sentence is not really clear to me. It is a long sentence and a bit confusing. I would recommend rephrasing it.

→ This sentence has been split and rephrased to make it clearer (L47-49).

Page 4:

L2: delete “the” in front of “environmental conditions”.

Done.

L2-L9: that paragraph is a bit confusing to me. I think the main points you want to make is that catchability, population size as well as habitat use change spatially and seasonally. Because you mention the reason for two of the factors (habitat use and population size) in between of the enumeration of the three parameters the readers gets a bit confused. I would advise rephrasing this paragraph.

→ As you pointed out, the logical flow of this paragraph was not good and unclear. We have rewritten the paragraph to make it clearer (L47-56).

L17: Why does simultaneous estimation in a Bayesian framework results in less error? I would recommend giving some additional explanation for this. Does not need to be long, but one addition sentence may help to get more clarity here.

→ The following sentence has been added, “because independent estimates can amplify errors by themselves”. (L60-61)

L20: You mention here trapping records. I guess that this is the same as harvest records? But that is a guess and not really clear. I would advise using consistent words for it. And also some additional information about it. I was wondering for instance how sure you are about the fact that trapping by different municipalities and during different seasons

was conducted with a constant effort? If that is an assumption you have to be quite certain about it, because I think that this can have huge impact on the results if it is not conducted with constant effort. Otherwise it might be really similar to hunting bag? I see now that you mention the trapping effort in the methods. That's good, but I would say, make sure that the reader knows here already that you take different trapping effort into account. Simply one short additional sentence should be enough.

→ The following information on the harvest records has been added “mainly number of trapped individuals and trapping effort” in the introduction part (L66).

L24-L29: I would rephrase this last part of the introduction. At the moment it feels a bit lost from the earlier paragraph. I would recommend something like: “Based on seasonal dynamics of the three parameters, we proposed an effective trapping strategy for sites and timing of trap placement on a landscape level for an example study area in the southern part of Chiba prefecture, central Japan.” By simply switching first and last part of your paragraph it better links to the earlier paragraph.

Done

Page 5:

L1: There seems to be a clear distinction between hunting and trapping. I think that this needs to be clearer for the reader at an early stage. I start now understanding that there is a difference, but it can be much easier for the reader if it is explained clearly at the beginning of the manuscript. I think that it namely not so common to have trapping (as you define it) next to hunting methods for wild boar control. At least not in Europe. Thus, I guess that European readers may be a bit confused here.

→ As with the earlier responses, we have made the usage of terms being consistent, and clarified the definition. (L66, 87-88)

L6-L11: I think that you can better combine those two sentences. Now it seems a bit that you rephrase the same sentence again.

Done.

L14: If I understand correctly you distinguished between juveniles (0-4 months) and adults (>4months). Wouldn't you expect differences in catchability and habitat use between piglets (<13 months), sub-adults/yearlings (13-24 months old individuals) and adults (>24 months old individuals) as well? I understand if the distinction of other age classes only on camera traps is not possible but I think that it is important to mention this possible limitation of the study here.

→The limitation of distinguishing yearlings using camera traps has been described, as mentioned in the response to major comment 6.

L21: where the camera traps randomly distributed throughout the area? I guess so because you used the Rowcliffe method, but I don't see that you mention it in this paragraph.

Done

L35: “The environmental variable was based on land use data...” add “was based” to your sentence.

Done

L37: add “average” home range? That is probably more appropriate.

Done.

L45: I think that it is clearer if you write “... six landscape elements...” instead of “six environmental elements”.

Done.

L60: see my comments on the age classes before. I think some additional explanation is necessary why you did not distinguish between yearlings and adults as well. Especially when you have trapping data more than only the two age classes you distinguish may be available.

→ Yearlings are not always distinguishable for some individuals due to rapid body growth in Japan. Even more important is to match the trapping data with camera data.

Page 6:

L9: replace “rest were” by “remaining percentage was”.

Done.

L29: what is the distribution of the staying time? is there a lot of variation? I would like to see a histogram of the staying time variable in the supplementary material.

→ added as a supplementary information (S4).

Page 8:

L17: Put posterior distributions in the supplemental material please.

→ added as a supplementary information (S6).

L28: rather than “environmental variables”, I would name it “landscape variables”. That is more precise and clearer to the reader.

Done.

L39-41: I would put those two lines in the methods instead of in the results.

Done.

Page 9:

L27: “simultaneous estimation”. Is that one of the major advantages of this technique/tool that you used here? If so, I would make that clear to the reader. At the moment it pops up in the title and here in the first sentence of discussion, but to me it is not really clear if that is an important point or not. Needs some clarification here. Ok, I see now in the next sentences of the discussion that you mention the advantages. I would already see those points in the introduction (when elaborating the problem).

→ I have already described a brief explanation in the introduction part.

L29: delete “quite” in sentence “quite useful”. It is useful!

Done.

L40: I miss a bit more in-depth detail about how exactly this methods shows advantages. Why and how are parameter estimates more reliable?

→ We agree “more reliable” is not appropriate here. Now rephrased as follows, “Considering seasonal fluctuations, we seemed to have obtained reasonable estimates of population density”.(L245)

L45: refer to the reports. How do we know what is the “correct” density? How do we know if those estimates are more reliable than others, which are also estimated? That is not explained enough here and should be more convincing.

→ We have removed the phrase of the more precise estimates in comparison to previous reports.

L60: can you add overview of number of cameras in each landscape element in the study area (in supplemental material) so that you can underline your word “mainly” by a number/percentage. That makes your sentence more convincing.

→ “Mainly” was actually incorrect, and reworded as “all”.

Page 10:

L4: ON average. Not “in average”.

Done.

Page 11:

L20: Can you also mention management implications for countries that do not use trapping as control measure for the population?

→ The applicability of our model to any types of hunting data, including shooting data, has described in the paragraph. (L313-316)

L39-L46: As mentioned in my general comments, you can put much more focus on this last paragraph in your introduction and make it much more interesting for a broader public.

→ We have described the general focus of our study, with two sentences, in the introduction part (L23-25, 68-70).

Page 12:

L10: reference nr 17 populationabundance should be two separate words.

Done.

Page 15:

Figure 1: What are the boxes and circles indicating? Mention it in the figure description. I anyway need some addition explanation for figure 1. When you only read the introduction where the first time is referred to figure 1 and by having only those information from introduction and figure description it is difficult to understand the figure. For instance, what is meant with density/mesh? I would advise either give additional explanation in introduction and/or figure description or make an easier graphical representation for the introduction.

→ We have revised the figure and added detailed description in the figure legend to make the meaning clearer. The framework includes estimated parameters (circles) and

data (rectangles) at three different spatial scales (camera site, approximate home range, and management unit). We believe the new figure becomes much easier to understand.

Page 16:

L 50: Figure 4: is juvenile density never below adult density or not visible in month December-April for the juveniles because it lies below the density of the adults? If the latter is the case I would advise to use lines instead of filling the surface. Wouldn't be nicer to add also the bars in the two different colors (light and dark grey) for the two age classes? What is the reason to use the 50% credible interval and not a 95% confidence interval or a standard error?

→ This is actually a stacked area graph, rather than line graph with filled area. No juveniles were observed from December to March. Such explanation has been added in the figure legend. Since we used Bayesian estimation of population density, "credible intervals" are more appropriate. 50% credible intervals are often used in applied studies, such as fisheries management, epidemiology, and climatic predictions. This is because the aims are parameter estimation, not statistical testing. As we want to know seasonal trends in population density and trap catchability, we used 50% credibility intervals. For estimating environmental preference (Fig. 6), we used 95% credible intervals, as we want to know whether forests with a particular land-cover nearby are preferred more than just a chance.

Page 17:

L20: put the x-axis with the month at the bottom (at  $y=-1$  for instance) so that it is easier to read and not all the months names are below the lines and points. This makes the graph a bit confusing.

Done.

L54: "throughout the year" instead of "through a year".

Done.

Supporting information:

L14: typing error: "monitoring".

Done

L20: Fig. S4: b) y axis is entitled with number of videos with two most left graphs, but has frequency on y-axis for the two most right and two central graphs. I think that you should remove the "frequency" on the y-axis, as it is also removed in (a). I don't understand in the figure description what you mean with y-values of circular points in the figures. I don't see any circular points.

→ We have removed the description of circular points.

L26: In reference Rowcliffe et al, (2014) is missing.

Done

## Responses to Reviewer: 2

Thank you for valuable comments. **The revised parts are indicated by red letters in the revised manuscript.** Below you can see the responses to each of your comments.

I have found your work timely and interesting. My main concern is the potential pseudoreplication in your experimental design. I think that the incorporation of the camera id as a random term (e.g., intercept), will improve your Bayesian modelling preventing from getting spurious effects (see, Paul-Christian Bürkner. 2020. Package 'brms' 2.12.0 version).

→ Thank you for the comment. We agree that pseudoreplication may be an important issue in the analyses of spatial data. However, the current model should have already considered the possible random effects at camera stations. We assume that the number of videos captured by camera traps follows a negative binomial distribution, which is equivalent to the Poisson distribution with gamma random effects. Although we did not consider the random effects in the staying time, our preliminary analyses based on WAIC model selections suggest that models accounting for the effect were mostly not better than those without it, as shown below. In the manuscript, we added the explanations in Line 152-154, 163.

Table. Values of WAIC (Watanabe-Akaike widely applicable information criterion, Watanabe 2013) after fitting log-normal distribution with and without random effect at camera stations to the staying time. Minimum values are shown in bold.

| No. | Age      | Year | Month | With random effect | Without random effect |
|-----|----------|------|-------|--------------------|-----------------------|
| 1   | Adult    | 2018 | 6     | 280.0              | <b>267.3</b>          |
| 2   | Adult    | 2018 | 7     | 292.7              | <b>270.4</b>          |
| 3   | Adult    | 2018 | 8     | <b>259.5</b>       | 264.0                 |
| 4   | Adult    | 2018 | 9     | 261.1              | <b>247.7</b>          |
| 5   | Adult    | 2018 | 10    | 251.6              | <b>238.5</b>          |
| 6   | Adult    | 2018 | 11    | 318.2              | <b>293.2</b>          |
| 7   | Adult    | 2019 | 12    | 309.5              | <b>283.1</b>          |
| 8   | Adult    | 2019 | 1     | 289.4              | <b>282.7</b>          |
| 9   | Adult    | 2019 | 2     | 298.8              | <b>289.8</b>          |
| 10  | Adult    | 2019 | 3     | <b>267.9</b>       | 268.5                 |
| 11  | Adult    | 2019 | 4     | 275.8              | <b>267.8</b>          |
| 12  | Adult    | 2019 | 5     | 286.5              | <b>276.0</b>          |
| 13  | Juvenile | 2018 | 6     | 259.8              | <b>256.5</b>          |
| 14  | Juvenile | 2018 | 7     | 297.8              | <b>283.6</b>          |
| 15  | Juvenile | 2018 | 8     | 279.3              | <b>263.7</b>          |
| 16  | Juvenile | 2018 | 9     | 272.2              | <b>271.2</b>          |
| 17  | Juvenile | 2018 | 10    | 103.2              | <b>99.3</b>           |
| 18  | Juvenile | 2019 | 5     | 115.7              | <b>112.3</b>          |

Other minor comments have been included in the pdf.

→ The first comment is not relevant, as this sentence describes wildlife issues in general, and citing references of deer is not out of place. The second comment is about the range expansion of wild boars in urban areas. This has been briefly touched.(L35-36)

## Appendix C

Responses to the comments

Thank you for the comments.

I have revised the final manuscript as follows.

Minor comments:

Page 13:

Line 38: make clear that the reader understands the novelty of this approach. You say that it accounts for spatial and temporal heterogeneity in detectability. Maybe it would be good to add one sentence that in the previous approaches, this has not been done. I see that this is what you want to make say, but I would state it in an additional sentence.

→ The following sentence has been added, "Since earlier methods assumed simple situations with no spatial structures of densities,"

Page 17:

Line 20: Put the table that you used as response to the comment from reviewer 2 in the supplement as well and refer to it here.

→ The table has been added to the supplementary file (table S1).

Page 22:

Line 27: What do you mean with "in separation"? seperately is maybe a better word?

→ Changed as "with single density proxy or multiple proxies used separately"

Line 29: You say that the density estimates become much more precise. Is it precise? Or do you mean accurate? You state it but you did not test (statistically) if the results are more precise/accurate right? I would rephrase this sentence a bit to reduce the chance of misinterpretation by the reader.

→ Changed to "unbiased"

Line 30: Off course our models can also be used for eradication...". Add also in the sentence for clarity.

→ "Off course" has been deleted and "Other than species conservation" has been added instead.
